# Supplementary material for: Carbazole endcapped heterofluorenes as host materials: theoretical study of their structural, electronic, and optical properties
Source: Royal Society of Chemistry journal article supplement (doi:10.1039/c0cp00132e), 2010-01-01
Supplement: c0cp00132e.pdf [file c0cp00132e.pdf]

**Supporting Information:**

**Carbazole Endcapped Heterofluorenes as Host  
Materials: Theoretical Study of Their Structural,  
Electronic, and Optical Properties**

**Jun Yin, Sheng-Lan Zhang, Run-Feng Chen\*, Qi-Dan Ling and Wei Huang\***

**Table S1.** The total energies and relative stability of Anti- and Syn- Configurations of CzCFs.

| Molecule        | $E_{\text{Anti}}$ (a.u.) | $E_{\text{Syn}}$ (a.u.) | $E_{(\text{Anti-Syn})}$ (kcal/mol) |
|-----------------|--------------------------|-------------------------|------------------------------------|
| <i>m</i> -CzCF  | -1612.595571             | -1612.595584            | 0.00762                            |
| <i>p</i> -CzCF  | -1612.596277             | -1612.596279            | 0.00132                            |
| <i>m</i> -CzSiF | -1864.008959             | -1864.008865            | -0.05890                           |
| <i>p</i> -CzSiF | -1864.009218             | -1864.009194            | -0.01510                           |
| <i>m</i> -CzGeF | -3649.509260             | -3649.509117            | -0.08985                           |
| <i>p</i> -CzGeF | -3649.510110             | -3649.510086            | -0.01515                           |
| <i>m</i> -CzNF  | -1589.326684             | -1589.326659            | -0.01613                           |
| <i>p</i> -CzNF  | -1589.327562             | -1589.327476            | -0.05410                           |
| <i>m</i> -CzPF  | -1875.923114             | -1875.923035            | -0.04898                           |
| <i>p</i> -CzPF  | -1875.923343             | -1875.923217            | -0.07939                           |
| <i>m</i> -CzOF  | -1569.871676             | -1569.871592            | -0.05292                           |
| <i>p</i> -CzOF  | -1569.872188             | -1569.872171            | -0.01066                           |
| <i>m</i> -CzSF  | -1892.849913             | -1892.849899            | -0.00882                           |
| <i>p</i> -CzSF  | -1892.850409             | -1892.850327            | -0.05136                           |

The stability of the anti and syn configuration is almost equivalent within 0.1kcal/mol as seen in Table S1. For most of CzCFs, the anti configuration is much more stable than the anti configuration, so the former configuration is more suitable to the following calculations.

**Table S2.** Central Hetero-ring and Inter-ring Bond Lengths (Å), Bond Angles (°), Dihedral Angles (°) and Dipole Moment ( $\mu$ ) of CzHFs in the Ground-State.

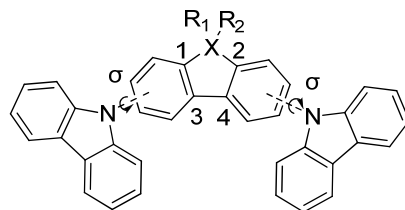

| Molecules     | Central hetero-ring |           |           |             |                |             | Inter-ring   |                | Dipole Moment ( $\mu$ ) |
|---------------|---------------------|-----------|-----------|-------------|----------------|-------------|--------------|----------------|-------------------------|
|               | Bond Lengths        |           |           | Bond Angles |                |             | Bond Lengths | Torsion Angles |                         |
|               | X–C(1)              | C(1)–C(3) | C(3)–C(4) | X–C(1)–C(3) | C(1)–C(3)–C(4) | C(1)–X–C(2) | C–N          | $\sigma$       |                         |
| <i>m</i> -CBP | —                   | 1.4048    | 1.4868    | —           | 120.75         | —           | 1.420        | 55.8           | 2.5404                  |
| <i>p</i> -CBP | —                   | 1.4055    | 1.4828    | —           | 121.15         | —           | 1.418        | 53.8           | 0.0003                  |
| <i>m</i> -CF  | 1.5279              | 1.4087    | 1.4689    | 111.06      | 108.41         | 101.06      | 1.421        | 56.7           | 3.0632                  |
| <i>p</i> -CF  | 1.5289              | 1.4094    | 1.4661    | 110.98      | 108.50         | 101.05      | 1.420        | 55.4           | 0.0972                  |
| <i>m</i> -SiF | 1.8857              | 1.4185    | 1.48943   | 109.39      | 115.07         | 91.08       | 1.420        | 55.0           | 3.1472                  |
| <i>p</i> -SiF | 1.8874              | 1.4190    | 1.4858    | 109.26      | 115.21         | 91.07       | 1.420        | 54.3           | 0.4306                  |
| <i>m</i> -GeF | 1.9399              | 1.4152    | 1.49012   | 109.05      | 116.11         | 89.68       | 1.420        | 55.5           | 3.2993                  |
| <i>p</i> -GeF | 1.9421              | 1.4156    | 1.48613   | 108.99      | 116.21         | 89.59       | 1.420        | 55.2           | 0.5281                  |
| <i>m</i> -NF  | 1.3890              | 1.4207    | 1.44752   | 109.16      | 106.53         | 108.60      | 1.423        | 61.0           | 4.7909                  |
| <i>p</i> -NF  | 1.3895              | 1.4211    | 1.4458    | 109.13      | 106.57         | 108.58      | 1.422        | 56.7           | 0.9717                  |
| <i>m</i> -PF  | 1.8388              | 1.4139    | 1.47201   | 112.33      | 113.04         | 89.04       | 1.420        | 55.1           | 2.2590                  |
| <i>p</i> -PF  | 1.8409              | 1.4144    | 1.46865   | 112.17      | 113.18         | 89.05       | 1.419        | 55.4           | 1.2786                  |
| <i>m</i> -OF  | 1.3757              | 1.4077    | 1.45211   | 111.72      | 105.32         | 105.91      | 1.422        | 59.2           | 1.6113                  |
| <i>p</i> -OF  | 1.3763              | 1.4081    | 1.45012   | 111.65      | 105.39         | 105.93      | 1.418        | 54.5           | 1.4888                  |
| <i>m</i> -SF  | 1.7662              | 1.4130    | 1.45503   | 112.51      | 112.06         | 90.85       | 1.420        | 57.4           | 1.6262                  |
| <i>p</i> -SF  | 1.7678              | 1.4135    | 1.45250   | 112.40      | 112.16         | 90.88       | 1.418        | 54.7           | 1.2328                  |

The main geometric changes take places as follows: (1) After connecting the biphenyl of *m*-/*p*-CBPs with different bridging heteroatoms, the C(1)–C(3) bond lengths are predicted to be slightly lengthened in all the studied molecules with the maximum increase of 0.016 Å found in *m*-/*p*-CzNFs. (2) The adoption of Ge atom in *m*-/*p*-CzGeFs leads to the longest X–C(1) and C(3)–C(4) bond lengths, while the use of O atom in *m*-/*p*-CzOFs leads to the shortest ones; (3) In comparison with *m*-/*p*-CBPs, the C(3)–C(4) between the central biphenyl of CzHFs were predicted to be enhanced with reduced bond lengths (except for *m*-/*p*-CzSiFs and *m*-/*p*-CzGeFs), and the largest bond lengths decrement was 0.037 Å in *m*-/*p*-CzNFs, which may be ascribed to the different interactions between the heteroatoms and the adjacent carbons; (4) The largest five-membered hetero-ring was found in GeFs due to larger X–C(1), C(1)–C(3), and C(3)–C(4); (5) The average inter-ring bond length between heterofluorene and carbazole moiety at 3,6- or 2,7- positions is 1.420 Å and the torsion angles vary from 53° to 61°, indicating that the using of different bridging heteroatoms may influence the degree of spatial torsion of carbazole; (6) The *p*-type CzHFs have slightly better coplanar nature than *m*-type CzHFs with the lower torsion angle between the heterofluorene core and the carbazole substituents.

**Table S3.** Central Hetero-ring and Inter-ring Bond Lengths (Å), Bond Angles (°), Torsion Angles (°), and Dipole Moment ( $\mu$ ) of CzHFs in the lowest Triplet State ( $T_1$ )

| Molecules       | Central hetero-ring |           |           |             |                |             | Inter-ring   |                     | Dipole Moment ( $\mu$ ) |
|-----------------|---------------------|-----------|-----------|-------------|----------------|-------------|--------------|---------------------|-------------------------|
|                 | Bond Lengths        |           |           | Bond Angles |                |             | Bond Lengths | Torsion Angles      |                         |
|                 | X-C(1)              | C(1)-C(3) | C(3)-C(4) | X-C(1)-C(3) | C(1)-C(3)-C(4) | C(1)-X-C(2) | C-N          | $\sigma_1/\sigma_2$ |                         |
| <i>m</i> -CBP   | —                   | 1.4591    | 1.4025    | —           | 122.63         | —           | 1.405        | 51.8/51.8           | 1.2858                  |
| <i>p</i> -CBP   | —                   | 1.4667    | 1.4030    | —           | 122.16         | —           | 1.418        | 47.3/47.3           | 0.0104                  |
| <i>m</i> -CzCF  | 1.5301              | 1.4658    | 1.3875    | 110.25      | 109.34         | 100.82      | 1.417        | 50.5/50.5           | 1.6476                  |
| <i>p</i> -CzCF  | 1.5314              | 1.4574    | 1.3881    | 109.91      | 109.56         | 101.05      | 1.407        | 48.9/48.9           | 0.1757                  |
| <i>m</i> -CzSiF | 1.8788              | 1.4821    | 1.4012    | 109.67      | 115.19         | 90.26       | 1.416        | 50.2/50.7           | 1.3125                  |
| <i>p</i> -CzSiF | 1.8811              | 1.4765    | 1.3983    | 109.18      | 115.56         | 90.52       | 1.407        | 47.8/48.0           | 0.0607                  |
| <i>m</i> -CzGeF | 1.9349              | 1.4782    | 1.4005    | 108.95      | 116.45         | 89.20       | 1.416        | 50.6/50.9           | 1.5594                  |
| <i>p</i> -CzGeF | 1.9366              | 1.4713    | 1.3986    | 108.54      | 116.77         | 89.38       | 1.406        | 48.1/48.1           | 0.1784                  |
| <i>m</i> -CzNF  | 1.3940              | 1.4298    | 1.4206    | 107.96      | 107.19         | 110.02      | 1.415        | 47.7/45.8           | 2.7346                  |
| <i>p</i> -CzNF  | 1.3916              | 1.4562    | 1.3836    | 107.69      | 107.70         | 109.19      | 1.407        | 48.4/48.7           | 1.4179                  |
| <i>m</i> -CzPF  | 1.8411              | 1.4736    | 1.3909    | 112.42      | 113.42         | 88.19       | 1.416        | 50.7/50.6           | 0.9946                  |
| <i>p</i> -CzPF  | 1.8432              | 1.4660    | 1.3898    | 111.90      | 113.81         | 88.56       | 1.406        | 48.0/48.0           | 1.4018                  |
| <i>m</i> -CzOF  | 1.3886              | 1.4432    | 1.3861    | 110.45      | 106.63         | 106.36      | 1.423        | 55.6/49.0           | 3.2340                  |
| <i>p</i> -CzOF  | 1.3799              | 1.4440    | 1.3862    | 110.27      | 106.56         | 106.35      | 1.405        | 47.7/47.7           | 0.6939                  |
| <i>m</i> -CzSF  | 1.7504              | 1.4839    | 1.4028    | 110.79      | 112.90         | 91.79       | 1.404        | 43.2/57.8           | 4.2588                  |
| <i>p</i> -CzSF  | 1.7784              | 1.4530    | 1.3857    | 111.03      | 113.40         | 91.13       | 1.404        | 47.7/47.7           | 0.9033                  |

**Table S4.** Molecular Orbital Compositions (%) in CzHFs

| Molecules       | Orbital | Biphenyl | Heteroatom | Methyl | Carbazole |
|-----------------|---------|----------|------------|--------|-----------|
| <i>m</i> -CBP   | LUMO    | 93.1     | —          | —      | 6.90      |
|                 | HOMO    | 12.6     | —          | —      | 87.4      |
| <i>p</i> -CBP   | LUMO    | 87.9     | —          | —      | 12.1      |
|                 | HOMO    | 20.8     | —          | —      | 79.2      |
| <i>m</i> -CzCF  | LUMO    | 89.3     | 0.70       | 4.00   | 6.00      |
|                 | HOMO    | 14.9     | 0.20       | 0.30   | 84.6      |
| <i>p</i> -CzCF  | LUMO    | 84.0     | 0.60       | 3.80   | 11.6      |
|                 | HOMO    | 24.0     | 0.10       | 0.10   | 75.8      |
| <i>m</i> -CzSiF | LUMO    | 77.6     | 5.00       | 10.5   | 6.90      |
|                 | HOMO    | 15.0     | 0.10       | 0.10   | 84.8      |
| <i>p</i> -CzSiF | LUMO    | 76.5     | 4.63       | 9.59   | 9.28      |
|                 | HOMO    | 23.3     | 0.13       | 0.07   | 76.5      |
| <i>m</i> -CzGeF | LUMO    | 80.8     | 3.45       | 9.01   | 6.74      |
|                 | HOMO    | 14.5     | 0.06       | 0.04   | 85.4      |
| <i>p</i> -CzGeF | LUMO    | 78.4     | 3.24       | 8.16   | 10.2      |
|                 | HOMO    | 23.1     | 0.30       | 0.10   | 76.5      |
| <i>m</i> -CzNF  | LUMO    | 92.9     | 1.00       | 1.00   | 5.10      |
|                 | HOMO    | 19.1     | 6.30       | 1.10   | 73.5      |
| <i>p</i> -CzNF  | LUMO    | 86.6     | 0.90       | 0.90   | 11.6      |
|                 | HOMO    | 24.1     | 0.10       | 0.00   | 75.8      |
| <i>m</i> -CzPF  | LUMO    | 77.2     | 5.20       | 11.8   | 5.80      |
|                 | HOMO    | 12.5     | 3.20       | 1.80   | 82.5      |
| <i>p</i> -CzPF  | LUMO    | 74.9     | 4.80       | 10.6   | 9.70      |
|                 | HOMO    | 21.2     | 0.20       | 0.10   | 78.5      |
| <i>m</i> -CzOF  | LUMO    | 93.6     | 0.90       | —      | 5.50      |
|                 | HOMO    | 12.9     | 2.10       | —      | 85.0      |
| <i>p</i> -CzOF  | LUMO    | 87.6     | 0.90       | —      | 11.5      |
|                 | HOMO    | 21.2     | 0.10       | —      | 78.7      |
| <i>m</i> -CzSF  | LUMO    | 92.2     | 2.16       | —      | 5.64      |
|                 | HOMO    | 14.7     | 6.30       | —      | 79.0      |
| <i>p</i> -CzSF  | LUMO    | 86.3     | 2.10       | —      | 11.6      |
|                 | HOMO    | 20.8     | 0.10       | —      | 79.1      |

**Figure S1.** The simulated absorption spectra of CzHF<sub>s</sub> in vacuum.

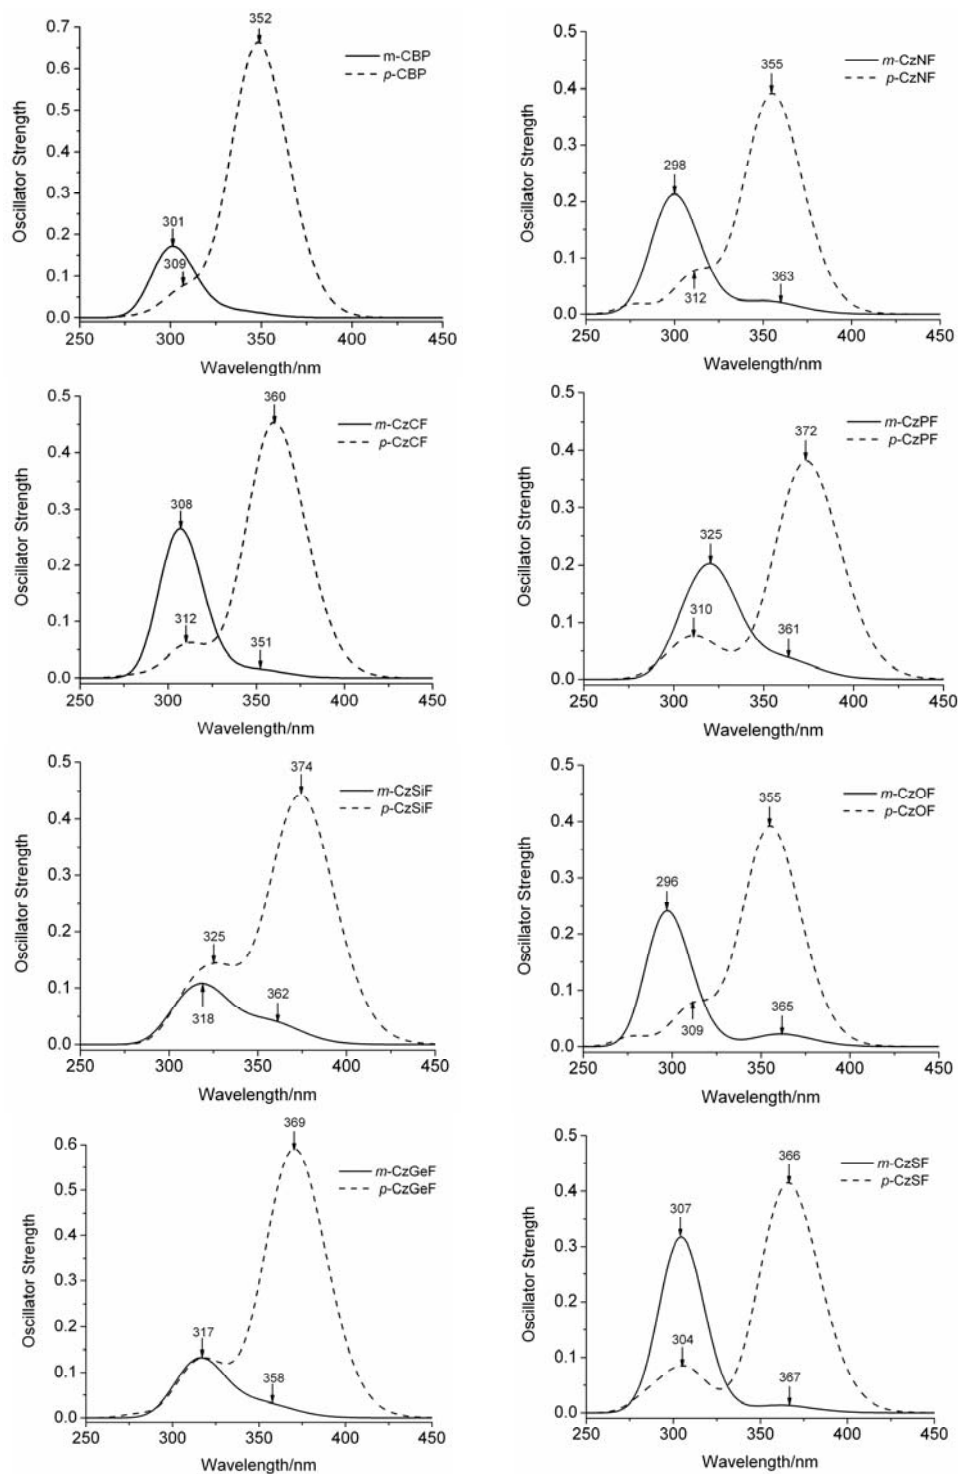

**Table S5.** Optimized geometries (in Å) and energies (in hartree) of *m*-CBP in the ground and lowest triplet excited states.

|   | S <sub>0</sub> state<br>Energy = -1495.85008 |             |             | T <sub>1</sub> state<br>Energy = -1495.741359 |             |             |
|---|----------------------------------------------|-------------|-------------|-----------------------------------------------|-------------|-------------|
| C | -2.71910100                                  | 3.64635000  | 0.95270300  | 2.83597300                                    | 3.85778900  | 0.33978800  |
| C | -3.49223200                                  | 2.51579800  | 0.69392500  | 3.56068100                                    | 2.65097100  | 0.38143000  |
| C | -2.88223200                                  | 1.36960400  | 0.16913300  | 2.83969100                                    | 1.41627100  | 0.26011900  |
| C | -1.50943100                                  | 1.37030600  | -0.09864300 | 1.47678200                                    | 1.40402300  | 0.11407700  |
| C | -0.72876700                                  | 2.51151200  | 0.14021300  | 0.69685800                                    | 2.62795100  | 0.08021400  |
| C | -1.35332400                                  | 3.65043900  | 0.67511200  | 1.46910400                                    | 3.86930200  | 0.19739700  |
| C | 0.72885600                                   | 2.51083700  | -0.15278000 | -0.69690900                                   | 2.62781600  | -0.08072600 |
| C | 1.50955300                                   | 1.37079800  | 0.09149700  | -1.47664000                                   | 1.40375300  | -0.11452900 |
| C | 2.88239900                                   | 1.36893800  | -0.17599800 | -2.83950000                                   | 1.41585300  | -0.26054500 |
| C | 3.49246900                                   | 2.51272800  | -0.70590900 | -3.56074700                                   | 2.65048200  | -0.38197600 |
| C | 2.71932400                                   | 3.64205300  | -0.97000300 | -2.83624600                                   | 3.85742600  | -0.34037500 |
| C | 1.35348100                                   | 3.64731700  | -0.69276500 | -1.46938300                                   | 3.86911000  | -0.19800900 |
| C | -3.15395400                                  | -0.13242000 | -2.55686700 | 2.30159100                                    | -1.02154200 | 2.15442300  |
| C | -3.43716800                                  | -0.95271900 | -3.64698800 | 2.29031300                                    | -2.19407600 | 2.90733300  |
| C | -4.29738000                                  | -2.05784500 | -3.52919100 | 3.25400200                                    | -3.19811700 | 2.71503700  |
| C | -4.89970400                                  | -2.35869200 | -2.31116100 | 4.26010600                                    | -3.04004100 | 1.76560200  |
| C | -4.63279500                                  | -1.55055500 | -1.19984100 | 4.29550700                                    | -1.87069000 | 0.99880500  |
| C | -3.75117500                                  | -0.44770900 | -1.33322300 | 3.30605500                                    | -0.87389500 | 1.19412500  |
| C | -5.08918500                                  | -1.56061100 | 0.17437200  | 5.19015600                                    | -1.38101700 | -0.03036000 |
| C | -5.94442300                                  | -2.39653900 | 0.90175700  | 6.32291100                                    | -1.91134400 | -0.65558900 |
| C | -6.16381100                                  | -2.13453200 | 2.25096200  | 6.95464400                                    | -1.17340700 | -1.65412700 |
| C | -5.53047700                                  | -1.04898100 | 2.88011500  | 6.45560600                                    | 0.08186100  | -2.03975700 |
| C | -4.67540100                                  | -0.20087800 | 2.17942900  | 5.32576800                                    | 0.63082100  | -1.43589000 |
| C | -4.46961500                                  | -0.46146100 | 0.82174800  | 4.71088000                                    | -0.10376300 | -0.41716400 |
| N | -3.65686600                                  | 0.20988600  | -0.10003000 | 3.56888000                                    | 0.20247800  | 0.33281000  |
| C | 4.67429100                                   | -0.21266100 | -2.17890000 | -5.32561600                                   | 0.63143800  | 1.43530100  |
| C | 5.52886600                                   | -1.06467400 | -2.87544700 | -6.45561700                                   | 0.08293900  | 2.03926800  |
| C | 6.16221800                                   | -2.14703000 | -2.24083300 | -6.95497200                                   | -1.17228200 | 1.65390500  |
| C | 5.94337100                                   | -2.40183100 | -0.89016300 | -6.32318700                                   | -1.91083900 | 0.65584500  |
| C | 5.08868700                                   | -1.56182600 | -0.16683500 | -5.19029700                                   | -1.38098400 | 0.03049500  |
| C | 4.46910000                                   | -0.46595600 | -0.81975100 | -4.71090100                                   | -0.10364800 | 0.41684800  |
| C | 4.63304100                                   | -1.54429500 | 1.20754800  | -4.29552600                                   | -1.87121900 | -0.99831500 |
| C | 4.90034400                                   | -2.34651500 | 2.32305800  | -4.26021200                                   | -3.04084700 | -1.76468300 |
| C | 4.29863600                                   | -2.03905100 | 3.53973400  | -3.25388700                                   | -3.19949400 | -2.71379400 |
| C | 3.43860600                                   | -0.93320500 | 3.65199700  | -2.28999600                                   | -2.19568700 | -2.90628900 |
| C | 3.15507400                                   | -0.11865500 | 2.55765600  | -2.30118200                                   | -1.02288800 | -2.15379800 |
| C | 3.75177400                                   | -0.44052500 | 1.33547500  | -3.30591700                                   | -0.87462300 | -1.19389100 |
| N | 3.65699500                                   | 0.21049100  | 0.09884200  | -3.56876700                                   | 0.20214100  | -0.33309700 |

|   |             |             |             |             |             |             |
|---|-------------|-------------|-------------|-------------|-------------|-------------|
| H | -3.18787400 | 4.53387100  | 1.36869300  | 3.37092900  | 4.79903000  | 0.43564700  |
| H | -4.56088000 | 2.51635700  | 0.88270700  | 4.63051400  | 2.63834900  | 0.55178200  |
| H | -1.05410800 | 0.47545800  | -0.51048700 | 0.98844400  | 0.44678200  | -0.01478000 |
| H | -0.76031500 | 4.53254400  | 0.89740900  | 0.95703000  | 4.82281500  | 0.18671700  |
| H | 1.05425300  | 0.47785400  | 0.50748200  | -0.98815700 | 0.44658900  | 0.01436300  |
| H | 4.56117600  | 2.51255700  | -0.89436500 | -4.63059800 | 2.63743000  | -0.55229600 |
| H | 3.18810300  | 4.52766200  | -1.39004200 | -3.37133000 | 4.79859200  | -0.43624400 |
| H | 0.76046700  | 4.52834000  | -0.91930800 | -0.95739900 | 4.82267400  | -0.18757900 |
| H | -2.49613700 | 0.72421900  | -2.65945700 | 1.55750300  | -0.24884700 | 2.31332800  |
| H | -2.98278100 | -0.72864200 | -4.60831000 | 1.51665300  | -2.33132800 | 3.65778900  |
| H | -4.49511000 | -2.67898100 | -4.39813100 | 3.21387300  | -4.10303200 | 3.31453500  |
| H | -5.57231200 | -3.20799700 | -2.22334800 | 5.01208700  | -3.81210600 | 1.62507800  |
| H | -6.42696300 | -3.24221300 | 0.41862700  | 6.70153900  | -2.88931700 | -0.37014900 |
| H | -6.82615700 | -2.77585300 | 2.82540600  | 7.83543900  | -1.57509900 | -2.14685300 |
| H | -5.70701800 | -0.86576800 | 3.93660200  | 6.95310100  | 0.63537800  | -2.83144500 |
| H | -4.18286400 | 0.62914600  | 2.67516100  | 4.93308700  | 1.59074700  | -1.75360800 |
| H | 4.18169100  | 0.61480000  | -2.67883700 | -4.93255000 | 1.59126500  | 1.75277600  |
| H | 5.70490100  | -0.88718000 | -3.93299400 | -6.95308300 | 0.63683400  | 2.83070900  |
| H | 6.82411800  | -2.79157000 | -2.81217800 | -7.83594300 | -1.57358300 | 2.14663300  |
| H | 6.42577500  | -3.24514900 | -0.40279700 | -6.70211000 | -2.88877100 | 0.37066300  |
| H | 5.57288600  | -3.19630100 | 2.23950000  | -5.01236300 | -3.81271900 | -1.62401800 |
| H | 4.49671800  | -2.65551500 | 4.41191500  | -3.21380100 | -4.10463600 | -3.31295200 |
| H | 2.98464200  | -0.70396200 | 4.61230100  | -1.51618300 | -2.33335900 | -3.65650900 |
| H | 2.49741400  | 0.73860700  | 2.65595800  | -1.55683300 | -0.25045200 | -2.31273500 |

**Table S6.** Optimized geometries (in Å) and energies (in hartree) of *p*-CBP in the ground and lowest triplet excited states.

|   | S <sub>0</sub> state |             |             | T <sub>1</sub> state  |             |             |
|---|----------------------|-------------|-------------|-----------------------|-------------|-------------|
|   | Energy = -1495.85102 |             |             | Energy = -1495.751071 |             |             |
| C | -1.46852600          | -1.14181500 | 0.37728900  | 1.48795000            | -1.22826200 | -0.03758600 |
| C | -2.86011600          | -1.14371400 | 0.38712200  | 2.85507600            | -1.22268200 | -0.03579000 |
| C | -3.56984900          | 0.00012300  | -0.00057600 | 3.58726200            | -0.00001700 | -0.00008200 |
| C | -2.86006200          | 1.14388700  | -0.38836600 | 2.85507300            | 1.22264800  | 0.03558200  |
| C | -1.46847500          | 1.14188100  | -0.37865700 | 1.48794700            | 1.22822800  | 0.03727100  |
| C | -0.74138200          | 0.00001600  | -0.00068400 | 0.70124400            | -0.00001700 | -0.00019300 |
| C | 2.86006200           | -1.14389000 | -0.38836500 | -2.85508100           | -1.22268500 | 0.03561400  |
| C | 1.46847500           | -1.14188300 | -0.37865600 | -1.48797100           | -1.22826500 | 0.03730600  |
| C | 0.74138200           | -0.00001800 | -0.00068500 | -0.70124700           | -0.00001400 | -0.00024900 |
| C | 1.46852600           | 1.14181400  | 0.37728500  | -1.48796300           | 1.22824300  | -0.03783800 |
| C | 2.86011700           | 1.14371400  | 0.38711600  | -2.85507200           | 1.22267500  | -0.03602400 |
| C | 3.56984900           | -0.00012500 | -0.00057900 | -3.58728400           | 0.00000000  | -0.00015000 |



Supplementary Material (ESI) for PCCP  
This journal is © the Owner Societies 2010

|   |             |             |             |             |             |             |
|---|-------------|-------------|-------------|-------------|-------------|-------------|
| C | -6.48234900 | 2.77448700  | 2.01326100  | 6.49460100  | 2.34553900  | -2.49975100 |
| C | -7.83240000 | 2.46323200  | 1.77738600  | 7.84324500  | 2.09062400  | -2.20131400 |
| C | -8.17882100 | 1.37258700  | 0.98516500  | 8.18883200  | 1.16709400  | -1.21693900 |
| C | -7.16513000 | 0.59180900  | 0.41775100  | 7.17435700  | 0.50800200  | -0.51680000 |
| C | -5.80809700 | 0.92925200  | 0.65342400  | 5.81784000  | 0.79472100  | -0.81215600 |
| C | -5.45393700 | 2.01447600  | 1.45988100  | 5.46493400  | 1.69904600  | -1.81814000 |
| C | -5.80852900 | -0.92886100 | -0.65357800 | 5.81775500  | -0.79477900 | 0.81219200  |
| C | -7.16541300 | -0.59165000 | -0.41667500 | 7.17430300  | -0.50803000 | 0.51701000  |
| C | -8.17949200 | -1.37256500 | -0.98320600 | 8.18870400  | -1.16710700 | 1.21726800  |
| C | -7.83362100 | -2.46313000 | -1.77576700 | 7.84301200  | -2.09066100 | 2.20158500  |
| C | -6.48373500 | -2.77413800 | -2.01291900 | 6.49433600  | -2.34561000 | 2.49984800  |
| C | -5.45494200 | -2.01396300 | -1.46048100 | 5.46474100  | -1.69912900 | 1.81811600  |
| N | -4.98810900 | 0.00028100  | -0.00046300 | 4.99183200  | -0.00002200 | -0.00001800 |
| C | 6.48234900  | -2.77448800 | 2.01325900  | -6.49469200 | -2.34613700 | -2.49915900 |
| C | 7.83240100  | -2.46323100 | 1.77738600  | -7.84332500 | -2.09113900 | -2.20074700 |
| C | 8.17882100  | -1.37258500 | 0.98516700  | -8.18888100 | -1.16736400 | -1.21658600 |
| C | 7.16513000  | -0.59180800 | 0.41775100  | -7.17438100 | -0.50811700 | -0.51663600 |
| C | 5.80809700  | -0.92925300 | 0.65342100  | -5.81787600 | -0.79491100 | -0.81197000 |
| C | 5.45393700  | -2.01447800 | 1.45987700  | -5.46499900 | -1.69947800 | -1.81774000 |
| C | 5.80852900  | 0.92886100  | -0.65357900 | -5.81772500 | 0.79497700  | 0.81199700  |
| C | 7.16541300  | 0.59165100  | -0.41667400 | -7.17428400 | 0.50817100  | 0.51693000  |
| C | 8.17949200  | 1.37256800  | -0.98320300 | -8.18865200 | 1.16742400  | 1.21706600  |
| C | 7.83362000  | 2.46313400  | -1.77576400 | -7.84290900 | 2.09122000  | 2.20114200  |
| C | 6.48373400  | 2.77414100  | -2.01291700 | -6.49421900 | 2.34623100  | 2.49928800  |
| C | 5.45494100  | 2.01396400  | -1.46048100 | -5.46465500 | 1.69956500  | 1.81767900  |
| N | 4.98810900  | -0.00028300 | -0.00046700 | -4.99183700 | 0.00001600  | -0.00004800 |
| H | -0.93739400 | -2.02953800 | 0.70847900  | 0.98318400  | -2.18428200 | -0.10525900 |
| H | -3.40379600 | -2.02356700 | 0.71647200  | 3.39940300  | -2.15948000 | -0.10515500 |
| H | -3.40373000 | 2.02378500  | -0.71764000 | 3.39939400  | 2.15944500  | 0.10500400  |
| H | -0.93729700 | 2.02957200  | -0.70985700 | 0.98317500  | 2.18424600  | 0.10492700  |
| H | 3.40373000  | -2.02378900 | -0.71763700 | -3.39941300 | -2.15947100 | 0.10512500  |
| H | 0.93729700  | -2.02957500 | -0.70985300 | -0.98319500 | -2.18427500 | 0.10504600  |
| H | 0.93739500  | 2.02953800  | 0.70847300  | -0.98318200 | 2.18424100  | -0.10571800 |
| H | 3.40379700  | 2.02356700  | 0.71646300  | -3.39940600 | 2.15946100  | -0.10554200 |
| H | -6.23126600 | 3.62392700  | 2.64275100  | 6.24468300  | 3.05571200  | -3.28313500 |
| H | -8.61046000 | 3.07719600  | 2.22193500  | 8.62244000  | 2.61092900  | -2.75085800 |
| H | -9.22328200 | 1.12623100  | 0.81244700  | 9.23288700  | 0.95556800  | -1.00153600 |
| H | -4.41447000 | 2.25565300  | 1.65596000  | 4.42728100  | 1.88508900  | -2.07152900 |
| H | -9.22383800 | -1.12638900 | -0.80953200 | 9.23278100  | -0.95555600 | 1.00199800  |
| H | -8.61198900 | -3.07719700 | -2.21963300 | 8.62214800  | -2.61095800 | 2.75122000  |
| H | -6.23309500 | -3.62348800 | -2.64270800 | 6.24433500  | -3.05579700 | 3.28319200  |
| H | -4.41562700 | -2.25491600 | -1.65759700 | 4.42705900  | -1.88519100 | 2.07137600  |

|   |            |             |             |             |             |             |
|---|------------|-------------|-------------|-------------|-------------|-------------|
| H | 6.23126700 | -3.62392900 | 2.64274800  | -6.24479800 | -3.05650500 | -3.28237300 |
| H | 8.61046000 | -3.07719400 | 2.22193700  | -8.62253900 | -2.61157100 | -2.75014400 |
| H | 9.22328200 | -1.12622700 | 0.81245100  | -9.23292800 | -0.95577700 | -1.00120400 |
| H | 4.41447000 | -2.25565700 | 1.65595400  | -4.42735100 | -1.88559100 | -2.07110600 |
| H | 9.22383700 | 1.12639300  | -0.80952700 | -9.23273900 | 0.95582900  | 1.00188800  |
| H | 8.61198800 | 3.07720200  | -2.21962800 | -8.62201800 | 2.61165800  | 2.75068200  |
| H | 6.23309400 | 3.62349100  | -2.64270500 | -6.24417800 | 3.05661100  | 3.28244400  |
| H | 4.41562600 | 2.25491500  | -1.65759800 | -4.42695800 | 1.88568300  | 2.07084100  |

**Table S7.** Optimized geometries (in Å) and energies (in hartree) of *m*-CzCF in the ground and lowest triplet excited states.

|   | S <sub>0</sub> state<br>Energy = -1612.5946 |             |             | T <sub>1</sub> state<br>Energy = -1612.362686 |             |             |
|---|---------------------------------------------|-------------|-------------|-----------------------------------------------|-------------|-------------|
| C | -1.17614700                                 | 2.95202100  | 0.08766000  | 1.17687400                                    | 2.94950800  | -0.07327300 |
| C | -2.53514600                                 | 3.22872900  | 0.18549200  | 2.51954100                                    | 3.21267400  | -0.14577100 |
| C | -3.44847300                                 | 2.17340300  | 0.26185000  | 3.44721000                                    | 2.14314900  | -0.20046100 |
| C | -3.00522100                                 | 0.84269400  | 0.21814800  | 2.98168900                                    | 0.78144100  | -0.16502300 |
| C | -1.63807600                                 | 0.55661100  | 0.11000800  | 1.64146700                                    | 0.48682800  | -0.09202300 |
| C | -0.73223300                                 | 1.61542400  | 0.05595400  | 0.69202700                                    | 1.56645000  | -0.04931700 |
| C | 0.73233800                                  | 1.61545100  | -0.05623200 | -0.69199400                                   | 1.56643500  | 0.04948600  |
| C | 1.17622500                                  | 2.95205800  | -0.08769200 | -1.17687400                                   | 2.94951900  | 0.07323000  |
| C | 0.00003100                                  | 3.92329400  | 0.00004400  | 0.00000800                                    | 3.92461200  | 0.00007500  |
| C | 1.63819500                                  | 0.55665500  | -0.11040500 | -1.64142300                                   | 0.48680300  | 0.09225400  |
| C | 3.00535300                                  | 0.84277300  | -0.21835500 | -2.98165100                                   | 0.78139900  | 0.16496800  |
| C | 3.44858000                                  | 2.17349500  | -0.26184400 | -3.44722000                                   | 2.14313700  | 0.20007200  |
| C | 2.53522900                                  | 3.22879400  | -0.18542400 | -2.51955500                                   | 3.21267100  | 0.14541300  |
| C | 0.09429200                                  | 4.81037700  | 1.26228800  | -0.07773300                                   | 4.81316200  | -1.26210700 |
| C | 3.95827100                                  | -1.25270700 | -1.22560700 | -3.93816300                                   | -1.32906900 | 1.14689000  |
| C | 3.10315900                                  | -1.47445900 | -2.30874300 | -3.02256800                                   | -1.63857800 | 2.15641100  |
| C | 3.34978100                                  | -2.58556700 | -3.11233500 | -3.27450500                                   | -2.76379400 | 2.93891700  |
| C | 4.42292700                                  | -3.45519500 | -2.85181700 | -4.40946300                                   | -3.56460000 | 2.72814000  |
| C | 5.27833700                                  | -3.22209500 | -1.77899800 | -5.32545100                                   | -3.24389700 | 1.72990200  |
| C | 5.05359700                                  | -2.11255700 | -0.95553700 | -5.09705100                                   | -2.11754500 | 0.93235500  |
| C | 5.73446000                                  | -1.57400000 | 0.20346200  | -5.83522000                                   | -1.49739500 | -0.14890600 |
| C | 5.02726300                                  | -0.40686400 | 0.58997900  | -5.09808600                                   | -0.35345900 | -0.54643000 |
| N | 3.94952800                                  | -0.21780900 | -0.28295600 | -3.94805100                                   | -0.25178600 | 0.24730200  |
| C | 6.85403700                                  | -1.97712500 | 0.94086500  | -7.02443100                                   | -1.81755600 | -0.81165900 |
| C | 7.24662500                                  | -1.22546500 | 2.04451500  | -7.45779100                                   | -1.00624100 | -1.85753300 |
| C | 6.52610600                                  | -0.07884400 | 2.42108100  | -6.70530500                                   | 0.11213100  | -2.25307400 |
| C | 5.40886100                                  | 0.34495400  | 1.70461500  | -5.51465800                                   | 0.45006100  | -1.61230200 |
| C | -5.02713400                                 | -0.40698500 | -0.59016900 | 5.09811700                                    | -0.35345700 | 0.54639300  |

Supplementary Material (ESI) for PCCP  
This journal is © the Owner Societies 2010

|   |             |             |             |             |             |             |
|---|-------------|-------------|-------------|-------------|-------------|-------------|
| C | -5.40864600 | 0.34467900  | -1.70494600 | 5.51472900  | 0.45008700  | 1.61223400  |
| C | -6.52607700 | -0.07897600 | -2.42119800 | 6.70536900  | 0.11213900  | 2.25300600  |
| C | -7.24684500 | -1.22534000 | -2.04432000 | 7.45781800  | -1.00626700 | 1.85749200  |
| C | -6.85432900 | -1.97687300 | -0.94056400 | 7.02442500  | -1.81760000 | 0.81164700  |
| C | -5.73457800 | -1.57388100 | -0.20335100 | 5.83521400  | -1.49742800 | 0.14889300  |
| C | -5.05374800 | -2.11235900 | 0.95569400  | 5.09702000  | -2.11758600 | -0.93234400 |
| C | -3.95821100 | -1.25269400 | 1.22551300  | 3.93814500  | -1.32908500 | -1.14688000 |
| N | -3.94933500 | -0.21796000 | 0.28268900  | 3.94808000  | -0.25177400 | -0.24733200 |
| C | -5.27863200 | -3.22171700 | 1.77936100  | 5.32537200  | -3.24396500 | -1.72986900 |
| C | -4.42315500 | -3.45482700 | 2.85212200  | 4.40936400  | -3.56466100 | -2.72809100 |
| C | -3.34982300 | -2.58535700 | 3.11241100  | 3.27442600  | -2.76382900 | -2.93887300 |
| C | -3.10306700 | -1.47442100 | 2.30862600  | 3.02252700  | -1.63859300 | -2.15638300 |
| C | -0.09426000 | 4.81055200  | -1.26207200 | 0.07776800  | 4.81281900  | 1.26248600  |
| H | -2.89694900 | 4.25350800  | 0.21753600  | 2.88982500  | 4.23485600  | -0.17202900 |
| H | -4.51033000 | 2.37205900  | 0.36616300  | 4.50678500  | 2.33405400  | -0.32198800 |
| H | -1.30815500 | -0.47664900 | 0.05895600  | 1.30986000  | -0.54475900 | -0.03962100 |
| H | 1.30828100  | -0.47661900 | -0.05957300 | -1.30978100 | -0.54478400 | 0.04007400  |
| H | 4.51045100  | 2.37217500  | -0.36601200 | -4.50682000 | 2.33403700  | 0.32137900  |
| H | 2.89702300  | 4.25358200  | -0.21729400 | -2.88986500 | 4.23484900  | 0.17145800  |
| H | -0.78768500 | 5.45544600  | 1.34801800  | 0.80636100  | 5.45755300  | -1.33687700 |
| H | 0.97883800  | 5.45596600  | 1.21615900  | -0.96419500 | 5.45777300  | -1.22780200 |
| H | 0.16201200  | 4.20120600  | 2.16918300  | -0.13359600 | 4.20399500  | -2.16978100 |
| H | 2.27782200  | -0.80311100 | -2.52172900 | -2.14741500 | -1.02233400 | 2.32988000  |
| H | 2.69745500  | -2.77989500 | -3.95941300 | -2.57475000 | -3.02445100 | 3.72825600  |
| H | 4.58615900  | -4.31398800 | -3.49663700 | -4.57376900 | -4.43833000 | 3.35225600  |
| H | 6.11328100  | -3.89023900 | -1.58413300 | -6.20972700 | -3.85657200 | 1.57483600  |
| H | 7.40625200  | -2.86905700 | 0.65629500  | -7.59888500 | -2.69215800 | -0.51778400 |
| H | 8.11453000  | -1.52814200 | 2.62343700  | -8.38024800 | -1.24456800 | -2.37930400 |
| H | 6.84299900  | 0.49007400  | 3.29104900  | -7.05127500 | 0.72410700  | -3.08160900 |
| H | 4.85246300  | 1.22603900  | 2.00699900  | -4.92861300 | 1.30280600  | -1.93758800 |
| H | -4.85206400 | 1.22556500  | -2.00756400 | 4.92871700  | 1.30286700  | 1.93748600  |
| H | -6.84293200 | 0.48984900  | -3.29124000 | 7.05136900  | 0.72412800  | 3.08151900  |
| H | -8.11489000 | -1.52791800 | -2.62308500 | 8.38027000  | -1.24461000 | 2.37926400  |
| H | -7.40673500 | -2.86861500 | -0.65576800 | 7.59885800  | -2.69222200 | 0.51779000  |
| H | -6.11371600 | -3.88973900 | 1.58467600  | 6.20962800  | -3.85666700 | -1.57480200 |
| H | -4.58648500 | -4.31349200 | 3.49708700  | 4.57364300  | -4.43840700 | -3.35219300 |
| H | -2.69747200 | -2.77966700 | 3.95947300  | 2.57466200  | -3.02448100 | -3.72820700 |
| H | -2.27761300 | -0.80316700 | 2.52145500  | 2.14739700  | -1.02231800 | -2.32985700 |
| H | -0.97882000 | 5.45611900  | -1.21586300 | 0.96424500  | 5.45742000  | 1.22834800  |
| H | -0.16197100 | 4.20151300  | -2.16905800 | 0.13362500  | 4.20341500  | 2.17000300  |
| H | 0.78770300  | 5.45565100  | -1.34772600 | -0.80631600 | 5.45720200  | 1.33743100  |

**Table S8.** Optimized geometries (in Å) and energies (in hartree) of *p*-CzCF in the ground and lowest triplet excited states.

|   | S <sub>0</sub> state<br>Energy = -1612.5931 |             |             | T <sub>1</sub> state<br>Energy = -1612.369185 |             |             |
|---|---------------------------------------------|-------------|-------------|-----------------------------------------------|-------------|-------------|
| C | -1.18004700                                 | 0.01678200  | 0.26024100  | 1.18169300                                    | 0.30566000  | 0.02933400  |
| C | -2.53757100                                 | 0.02366300  | 0.55021200  | 2.51653100                                    | 0.58026600  | 0.04962200  |
| C | -3.46330200                                 | 0.04083100  | -0.50632600 | 3.46106300                                    | -0.50175200 | 0.04829200  |
| C | -3.01672300                                 | 0.04323700  | -1.83681100 | 2.99447300                                    | -1.85170100 | 0.03888100  |
| C | -1.65307900                                 | 0.01775400  | -2.12671600 | 1.65565600                                    | -2.14598400 | 0.02860700  |
| C | -0.73300500                                 | 0.00899100  | -1.07633500 | 0.69392400                                    | -1.06760900 | 0.01529900  |
| C | 0.73300100                                  | -0.00904400 | -1.07634100 | -0.69385600                                   | -1.06767300 | -0.01551100 |
| C | 1.18005500                                  | -0.01682200 | 0.26023100  | -1.18173100                                   | 0.30555500  | -0.03035700 |
| C | 0.00000800                                  | -0.00001700 | 1.23222900  | -0.00004900                                   | 1.27920300  | -0.00101600 |
| C | 1.65306600                                  | -0.01781700 | -2.12673000 | -1.65552000                                   | -2.14612700 | -0.02807800 |
| C | 3.01671300                                  | -0.04329100 | -1.83683500 | -2.99435400                                   | -1.85194000 | -0.03824100 |
| C | 3.46330300                                  | -0.04086800 | -0.50635400 | -3.46105800                                   | -0.50202500 | -0.04824700 |
| C | 2.53758100                                  | -0.02369500 | 0.55019200  | -2.51658700                                   | 0.58005800  | -0.05049800 |
| C | -0.01569600                                 | -1.26575900 | 2.11860300  | 0.03056500                                    | 2.16493000  | -1.26634700 |
| C | 5.79694900                                  | 0.86610100  | -0.70355300 | -5.80187300                                   | -0.80467400 | 0.79068100  |
| C | 5.60631400                                  | 1.99670600  | -1.50286500 | -5.62550700                                   | -1.70062500 | 1.84925300  |
| C | 6.72569300                                  | 2.76380500  | -1.81876000 | -6.75728900                                   | -2.09499100 | 2.56067900  |
| C | 8.00533700                                  | 2.42154200  | -1.34872300 | -8.03290300                                   | -1.60246200 | 2.23892300  |
| C | 8.18662600                                  | 1.30233000  | -0.54156900 | -8.19854000                                   | -0.68951900 | 1.19957800  |
| C | 7.07860900                                  | 0.51431600  | -0.20842700 | -7.07919400                                   | -0.28056800 | 0.46883700  |
| C | 6.90427400                                  | -0.67336600 | 0.60143600  | -6.88774900                                   | 0.65231400  | -0.62369500 |
| C | 5.52321400                                  | -0.99491400 | 0.56785600  | -5.50227300                                   | 0.65476600  | -0.92436200 |
| N | 4.85608100                                  | -0.05528600 | -0.22753300 | -4.84177400                                   | -0.23382200 | -0.06061900 |
| C | 7.78365500                                  | -1.48389500 | 1.32887700  | -7.75911000                                   | 1.44928400  | -1.37178100 |
| C | 7.28369100                                  | -2.59563900 | 2.00060000  | -7.24600300                                   | 2.22678400  | -2.40783400 |
| C | 5.91442700                                  | -2.90789600 | 1.94484100  | -5.87411300                                   | 2.20059300  | -2.70862500 |
| C | 5.01745900                                  | -2.11783300 | 1.22889200  | -4.98534700                                   | 1.41244200  | -1.97956600 |
| C | -5.52319900                                 | 0.99491600  | 0.56787200  | 5.50207700                                    | 0.65573100  | 0.92404700  |
| C | -5.01742500                                 | 2.11782800  | 1.22890400  | 4.98490300                                    | 1.41431300  | 1.97847400  |
| C | -5.91438600                                 | 2.90792700  | 1.94482500  | 5.87351300                                    | 2.20302900  | 2.70711200  |
| C | -7.28366000                                 | 2.59571000  | 2.00056100  | 7.24548400                                    | 2.22891500  | 2.40665800  |
| C | -7.78364100                                 | 1.48397200  | 1.32884100  | 7.75883000                                    | 1.45054600  | 1.37137600  |
| C | -6.90426900                                 | 0.67341000  | 0.60142700  | 6.88763200                                    | 0.65298600  | 0.62372700  |
| C | -7.07862200                                 | -0.51427800 | -0.20842400 | 7.07932900                                    | -0.28084000 | -0.46795400 |
| C | -5.79696200                                 | -0.86610600 | -0.70351900 | 5.80207700                                    | -0.80520500 | -0.78963900 |
| N | -4.85607600                                 | 0.05525600  | -0.22748800 | 4.84176300                                    | -0.23347100 | 0.06078800  |
| C | -8.18665500                                 | -1.30226500 | -0.54157600 | 8.19883900                                    | -0.69050300 | -1.19804700 |
| C | -8.00538200                                 | -2.42149300 | -1.34871100 | 8.03342600                                    | -1.60443700 | -2.23655600 |

|   |             |             |             |             |             |             |
|---|-------------|-------------|-------------|-------------|-------------|-------------|
| C | -6.72573900 | -2.76379900 | -1.81871900 | 6.75787700  | -2.09726300 | -2.55813900 |
| C | -5.60634400 | -1.99672900 | -1.50281200 | 5.62593600  | -1.70219000 | -1.84736400 |
| C | 0.01571900  | 1.26573000  | 2.11859800  | -0.03071600 | 2.16651300  | 1.26316400  |
| H | -2.90021300 | 0.00433700  | 1.57399200  | 2.88687700  | 1.60115800  | 0.02885700  |
| H | -3.74757100 | 0.07678200  | -2.63850500 | 3.72776600  | -2.65147900 | 0.07763000  |
| H | -1.32063700 | 0.01923500  | -3.16144400 | 1.32089300  | -3.17883100 | 0.04655700  |
| H | 1.32061600  | -0.01931100 | -3.16145500 | -1.32068700 | -3.17896000 | -0.04557900 |
| H | 3.74755600  | -0.07684300 | -2.63853400 | -3.72758700 | -2.65179400 | -0.07649600 |
| H | 2.90023100  | -0.00435900 | 1.57396900  | -2.88698900 | 1.60094100  | -0.03028700 |
| H | -0.90132200 | -1.27500600 | 2.76408900  | 0.91888600  | 2.80760400  | -1.26821400 |
| H | 0.86983200  | -1.29587800 | 2.76378600  | -0.85449100 | 2.81103200  | -1.30754100 |
| H | -0.02742400 | -2.17484600 | 1.50891500  | 0.05055500  | 1.55337600  | -2.17401200 |
| H | 4.62040800  | 2.27287400  | -1.86180200 | -4.64186200 | -2.06940400 | 2.11806100  |
| H | 6.60266600  | 3.64682700  | -2.44008400 | -6.64572500 | -2.79321100 | 3.38567200  |
| H | 8.85796800  | 3.03966700  | -1.61511800 | -8.89522500 | -1.92960000 | 2.81275900  |
| H | 9.17512600  | 1.04466200  | -0.17013800 | -9.18331100 | -0.29418700 | 0.96467600  |
| H | 8.84444400  | -1.24940300 | 1.36401700  | -8.82377500 | 1.45508700  | -1.15334600 |
| H | 7.95630400  | -3.23118800 | 2.56952000  | -7.91273800 | 2.85131900  | -2.99546200 |
| H | 5.54442800  | -3.78574900 | 2.46775200  | -5.49515500 | 2.80065000  | -3.53138600 |
| H | 3.96363300  | -2.37174600 | 1.18224900  | -3.93141600 | 1.38160900  | -2.23251000 |
| H | -3.96359100 | 2.37171100  | 1.18227900  | 3.93089700  | 1.38376500  | 2.23114400  |
| H | -5.54437100 | 3.78577600  | 2.46773200  | 5.49436200  | 2.80380100  | 3.52926200  |
| H | -7.95626500 | 3.23128300  | 2.56946100  | 7.91209100  | 2.85391100  | 2.99394100  |
| H | -8.84443700 | 1.24950900  | 1.36396300  | 8.82355300  | 1.45612500  | 1.15321600  |
| H | -9.17515500 | -1.04456400 | -0.17016700 | 9.18356900  | -0.29499500 | -0.96327000 |
| H | -8.85802600 | -3.03959500 | -1.61511600 | 8.89588100  | -1.93215400 | -2.80986200 |
| H | -6.60272500 | -3.64683200 | -2.44003000 | 6.64649900  | -2.79628200 | -3.38248000 |
| H | -4.62043900 | -2.27292900 | -1.86172700 | 4.64233300  | -2.07121800 | -2.11601400 |
| H | -0.86980100 | 1.29585000  | 2.76379000  | 0.85428600  | 2.81274000  | 1.30354500  |
| H | 0.02743900  | 2.17481200  | 1.50890400  | -0.05067500 | 1.55612000  | 2.17161200  |
| H | 0.90135200  | 1.27498300  | 2.76407300  | -0.91906400 | 2.80915200  | 1.26422700  |

**Table S9.** Optimized geometries (in Å) and energies (in hartree) of *m*-CzSiF in the ground and lowest triplet excited states.

|   | S <sub>0</sub> state |            |             | T <sub>1</sub> state  |            |            |
|---|----------------------|------------|-------------|-----------------------|------------|------------|
|   | Energy = -1864.0077  |            |             | Energy = -1863.775968 |            |            |
| C | -3.52309500          | 2.04387900 | -0.31607900 | 3.51567800            | 2.01765700 | 0.24007800 |
| C | -2.92470000          | 0.77847200 | -0.25849100 | 2.90350000            | 0.70980000 | 0.19439100 |
| C | -1.53524900          | 0.66361700 | -0.12663100 | 1.54215500            | 0.57545300 | 0.10452500 |
| C | -0.74165500          | 1.81246400 | -0.06707800 | 0.69820600            | 1.73673300 | 0.05637200 |
| C | -1.34071700          | 3.09730400 | -0.11761100 | 1.32782400            | 3.07784700 | 0.09681500 |

Supplementary Material (ESI) for PCCP  
This journal is © the Owner Societies 2010

|    |             |             |             |             |             |             |
|----|-------------|-------------|-------------|-------------|-------------|-------------|
| C  | -2.72917100 | 3.18952600  | -0.23516500 | 2.71094100  | 3.16056400  | 0.18648700  |
| C  | 1.34070100  | 3.09738900  | 0.11755400  | -1.32814900 | 3.07771000  | -0.09718400 |
| C  | 0.74171800  | 1.81250900  | 0.06712000  | -0.69843800 | 1.73666500  | -0.05617900 |
| C  | 1.53537400  | 0.66371500  | 0.12679900  | -1.54229200 | 0.57530600  | -0.10407700 |
| C  | 2.92482000  | 0.77865300  | 0.25870300  | -2.90361000 | 0.70951300  | -0.19456200 |
| C  | 3.52312900  | 2.04410800  | 0.31622400  | -3.51585200 | 2.01730000  | -0.24113200 |
| C  | 2.72914400  | 3.18970300  | 0.23515900  | -2.71122800 | 3.16028900  | -0.18758700 |
| Si | -0.00003700 | 4.41816800  | -0.00011700 | -0.00024400 | 4.40329600  | -0.00001100 |
| C  | 0.13680000  | 5.49985500  | -1.54428100 | -0.11446700 | 5.51035600  | 1.53303700  |
| C  | -0.13696600 | 5.50015200  | 1.54382900  | 0.11391900  | 5.51104500  | -1.53255000 |
| C  | 6.42554100  | -0.52711800 | -2.24907400 | -6.57381900 | -0.37034200 | 2.15513600  |
| C  | 6.98151500  | -1.75974200 | -1.86593500 | -7.18923700 | -1.56545300 | 1.74741200  |
| C  | 6.44847900  | -2.47438800 | -0.79713500 | -6.64755800 | -2.32427500 | 0.71241800  |
| C  | 5.35440900  | -1.94714600 | -0.10131700 | -5.48855500 | -1.87393700 | 0.07252800  |
| C  | 4.81464800  | -0.69528600 | -0.49249000 | -4.89139100 | -0.65486000 | 0.48174900  |
| C  | 5.33690600  | 0.02054200  | -1.57355400 | -5.41509500 | 0.09751500  | 1.53774600  |
| C  | 3.56516200  | -1.43591900 | 1.25406200  | -3.59744900 | -1.49515200 | -1.18670500 |
| C  | 4.55979900  | -2.41770200 | 1.01398200  | -4.66456500 | -2.40833800 | -0.99266200 |
| C  | 4.61224000  | -3.55883100 | 1.82295400  | -4.74977700 | -3.55283500 | -1.79235700 |
| C  | 3.68808000  | -3.70312600 | 2.85348000  | -3.78470200 | -3.76841000 | -2.77258800 |
| C  | 2.71782600  | -2.71340000 | 3.08655500  | -2.74321100 | -2.84509600 | -2.96369200 |
| C  | 2.64348100  | -1.56826700 | 2.29636200  | -2.63435800 | -1.69904800 | -2.17849200 |
| N  | 3.72624600  | -0.39104600 | 0.33479700  | -3.74468400 | -0.42524700 | -0.28981400 |
| C  | -2.71733400 | -2.71374000 | -3.08607200 | 2.74477600  | -2.84344300 | 2.96538600  |
| C  | -3.68772400 | -3.70337200 | -2.85318200 | 3.78623500  | -3.76677700 | 2.77420600  |
| C  | -4.61209900 | -3.55897000 | -1.82286100 | 4.75079200  | -3.55162100 | 1.79337300  |
| C  | -4.55976600 | -2.41780400 | -1.01393800 | 4.66508800  | -2.40753000 | 0.99314900  |
| C  | -3.56494400 | -1.43614600 | -1.25379100 | 3.59800400  | -1.49432500 | 1.18728300  |
| C  | -2.64304000 | -1.56860300 | -2.29587400 | 2.63543700  | -1.69779500 | 2.17966900  |
| C  | -4.81467600 | -0.69538200 | 0.49252100  | 4.89103200  | -0.65476800 | -0.48225000 |
| C  | -5.35455300 | -1.94715100 | 0.10119900  | 5.48849600  | -1.87359600 | -0.07272400 |
| C  | -6.44893700 | -2.47416900 | 0.79669000  | 6.64721100  | -2.32415900 | -0.71297800 |
| C  | -6.98210900 | -1.75943700 | 1.86536900  | 7.18830700  | -1.56580900 | -1.74862200 |
| C  | -6.42598400 | -0.52694100 | 2.24869100  | 6.57259500  | -0.37094500 | -2.15662500 |
| C  | -5.33706700 | 0.02052500  | 1.57346500  | 5.41414700  | 0.09712800  | -1.53888200 |
| N  | -3.72604300 | -0.39130200 | -0.33450400 | 3.74470600  | -0.42485100 | 0.28978900  |
| H  | -4.59903200 | 2.12048900  | -0.43724900 | 4.59009100  | 2.09343800  | 0.36321000  |
| H  | -1.09866700 | -0.32792800 | -0.06068400 | 1.11003600  | -0.41827700 | 0.04956400  |
| H  | -3.21300400 | 4.16306100  | -0.28058600 | 3.19714400  | 4.13373800  | 0.22777400  |
| H  | 1.09884200  | -0.32785800 | 0.06095800  | -1.11012000 | -0.41836900 | -0.04852600 |
| H  | 4.59905600  | 2.12079600  | 0.43744200  | -4.59021500 | 2.09295400  | -0.36478300 |
| H  | 3.21291700  | 4.16327000  | 0.28054400  | -3.19748900 | 4.13340900  | -0.22943500 |

|   |             |             |             |             |             |             |
|---|-------------|-------------|-------------|-------------|-------------|-------------|
| H | 1.02135200  | 6.14656500  | -1.49608100 | -1.00116400 | 6.15532900  | 1.48865100  |
| H | -0.74035800 | 6.14973100  | -1.64999300 | 0.76239900  | 6.16507400  | 1.61397700  |
| H | 0.21470700  | 4.88924200  | -2.45004200 | -0.17637200 | 4.91547600  | 2.45036800  |
| H | 0.73959900  | 6.15094500  | 1.64880300  | -0.76264700 | 6.16624300  | -1.61284200 |
| H | -1.02220300 | 6.14595300  | 1.49602000  | 1.00094400  | 6.15556700  | -1.48812400 |
| H | -0.21369000 | 4.88970700  | 2.44980400  | 0.17523600  | 4.91662100  | -2.45021500 |
| H | 6.84935500  | 0.01190500  | -3.09214100 | -7.00191700 | 0.19927700  | 2.97544200  |
| H | 7.83132900  | -2.15839100 | -2.41264700 | -8.08949900 | -1.90476100 | 2.25171600  |
| H | 6.87279500  | -3.43251300 | -0.50825800 | -7.11525500 | -3.25755300 | 0.40986200  |
| H | 4.90718300  | 0.96768600  | -1.88241100 | -4.93301100 | 1.00900500  | 1.87435400  |
| H | 5.36873400  | -4.31988900 | 1.64984700  | -5.56277900 | -4.26059400 | -1.65303200 |
| H | 3.71764600  | -4.58535800 | 3.48653700  | -3.83809900 | -4.65502800 | -3.39785100 |
| H | 2.01013600  | -2.83936100 | 3.90146200  | -2.00398000 | -3.02505900 | -3.73940100 |
| H | 1.89809300  | -0.80421300 | 2.49057000  | -1.83137500 | -0.98802900 | -2.33811900 |
| H | -2.00947700 | -2.83978400 | -3.90082100 | 2.00596200  | -3.02307200 | 3.74156800  |
| H | -3.71722200 | -4.58562600 | -3.48621400 | 3.84002100  | -4.65307700 | 3.39988500  |
| H | -5.36871800 | -4.31994300 | -1.64992400 | 5.56377500  | -4.25938900 | 1.65398900  |
| H | -1.89755000 | -0.80461500 | -2.48994700 | 1.83249000  | -0.98675200 | 2.33935500  |
| H | -6.87335300 | -3.43221500 | 0.50769900  | 7.11513400  | -3.25725200 | -0.41019900 |
| H | -7.83215800 | -2.15792100 | 2.41183600  | 8.08834000  | -1.90529900 | -2.25321200 |
| H | -6.84991400 | 0.01214600  | 3.09165900  | 7.00024000  | 0.19830300  | -2.97742600 |
| H | -4.90722300 | 0.96756800  | 1.88246300  | 4.93182800  | 1.00841900  | -1.87569000 |

**Table S10.** Optimized geometries (in Å) and energies (in hartree) of *p*-CzSiF in the ground and lowest triplet excited states.

|    | S <sub>0</sub> state |             |             | T <sub>1</sub> state  |             |             |
|----|----------------------|-------------|-------------|-----------------------|-------------|-------------|
|    | Energy = -1864.006   |             |             | Energy = -1863.782577 |             |             |
| C  | -3.54221100          | -0.07031900 | -0.44978300 | 3.52977000            | -0.43987200 | 0.00985000  |
| C  | -2.93834000          | -0.34688500 | -1.68339400 | 2.91517500            | -1.73863400 | 0.00451600  |
| C  | -1.55029900          | -0.38823400 | -1.79692300 | 1.55633900            | -1.87060500 | 0.00948800  |
| C  | -0.74197900          | -0.13554900 | -0.68223200 | 0.69911100            | -0.70778100 | 0.00675700  |
| C  | -1.34720100          | 0.15617100  | 0.56766700  | 1.33606500            | 0.62412500  | 0.01943600  |
| C  | -2.73693000          | 0.17709500  | 0.67264300  | 2.71094500            | 0.71653200  | 0.02243800  |
| C  | 1.34688100           | 0.13282200  | 0.57497400  | -1.33598300           | 0.62432500  | -0.01795300 |
| C  | 0.74374000           | -0.14653100 | -0.67872300 | -0.69905700           | -0.70770600 | -0.00923900 |
| C  | 1.55328700           | -0.40548000 | -1.79124100 | -1.55639800           | -1.87047000 | -0.01498100 |
| C  | 2.94118300           | -0.39820100 | -1.66806800 | -2.91517200           | -1.73840000 | -0.00955800 |
| C  | 3.54269600           | -0.11480900 | -0.43503400 | -3.52979200           | -0.43956600 | -0.01151600 |
| C  | 2.73657800           | 0.15389000  | 0.68151200  | -2.71082800           | 0.71683300  | -0.02067800 |
| Si | -0.00115200          | 0.44278800  | 1.85930500  | 0.00010800            | 1.94826000  | 0.00260600  |
| C  | 0.01178500           | 2.19854200  | 2.55779700  | -0.02152500           | 3.05076200  | 1.54280000  |

Supplementary Material (ESI) for PCCP  
This journal is © the Owner Societies 2010

|   |             |             |             |             |             |             |
|---|-------------|-------------|-------------|-------------|-------------|-------------|
| C | -0.01449500 | -0.82308900 | 3.26233500  | 0.02220600  | 3.05484200  | -1.53463900 |
| C | 6.26679900  | -2.45217000 | 2.27482900  | -6.25020300 | 1.99778600  | -2.63834700 |
| C | 7.63228700  | -2.16163100 | 2.11124600  | -7.61500600 | 1.85706100  | -2.33737100 |
| C | 8.04856500  | -1.22496900 | 1.16966700  | -8.03042500 | 1.01060100  | -1.31186500 |
| C | 7.08933100  | -0.56808300 | 0.39008000  | -7.06916800 | 0.31356100  | -0.57404800 |
| C | 5.71478900  | -0.86311400 | 0.57843700  | -5.69425900 | 0.48503200  | -0.87383500 |
| C | 5.29141700  | -1.81256500 | 1.51272400  | -5.27291000 | 1.31226300  | -1.91894000 |
| C | 5.83480900  | 0.68316200  | -1.07949400 | -5.81708700 | -1.02033200 | 0.82429300  |
| C | 7.16580900  | 0.41936800  | -0.66630200 | -7.14765300 | -0.64791400 | 0.50765100  |
| C | 8.22533600  | 1.09850600  | -1.27922200 | -8.21002900 | -1.19440600 | 1.23338800  |
| C | 7.94895200  | 2.02565300  | -2.27979600 | -7.93656800 | -2.09193600 | 2.26335100  |
| C | 6.62296200  | 2.28476800  | -2.66735900 | -6.61141300 | -2.43260900 | 2.58096000  |
| C | 5.55001700  | 1.62271500  | -2.07430800 | -5.53489700 | -1.89864300 | 1.87476500  |
| N | 4.95813200  | -0.09932300 | -0.31825500 | -4.93237000 | -0.32976800 | -0.01987200 |
| C | -6.29301200 | 3.13984200  | 1.09422300  | 6.24950600  | 1.98294200  | 2.65024300  |
| C | -7.65488200 | 2.79329500  | 1.06924300  | 7.61442800  | 1.84354400  | 2.34913500  |
| C | -8.06009900 | 1.55222900  | 0.58696600  | 8.03014900  | 1.00270800  | 1.31913900  |
| C | -7.09328700 | 0.64730400  | 0.13358800  | 7.06908600  | 0.30992500  | 0.57703800  |
| C | -5.72214900 | 1.00717900  | 0.18010100  | 5.69409900  | 0.47992400  | 0.87731400  |
| C | -5.31033700 | 2.25776800  | 0.64965600  | 5.27240300  | 1.30155300  | 1.92667100  |
| C | -5.82653700 | -1.07646300 | -0.71646000 | 5.81717100  | -1.01557800 | -0.82943600 |
| C | -7.15970900 | -0.68201900 | -0.43659300 | 7.14773100  | -0.64526800 | -0.51020200 |
| C | -8.21268400 | -1.56002800 | -0.71915100 | 8.21019100  | -1.18756000 | -1.23897500 |
| C | -7.92762100 | -2.80851700 | -1.26420700 | 7.93680800  | -2.07872600 | -2.27446500 |
| C | -6.59942900 | -3.18873400 | -1.52258400 | 6.61165400  | -2.41707400 | -2.59459800 |
| C | -5.53309900 | -2.33387000 | -1.25170200 | 5.53503400  | -1.88724000 | -1.88545200 |
| N | -4.95724500 | -0.04529500 | -0.33810600 | 4.93241800  | -0.32997700 | 0.01863200  |
| H | -3.56363400 | -0.52084700 | -2.55350100 | 3.55198900  | -2.61695200 | 0.03957000  |
| H | -1.10942200 | -0.60626600 | -2.76572800 | 1.11913900  | -2.86471800 | 0.03288600  |
| H | -3.22167000 | 0.37216900  | 1.62585100  | 3.19976700  | 1.68775300  | 0.00224200  |
| H | 1.11331100  | -0.62885100 | -2.75922400 | -1.11926200 | -2.86454700 | -0.04084700 |
| H | 3.56792500  | -0.62338400 | -2.52546800 | -3.55211400 | -2.61652800 | -0.04611900 |
| H | 3.22103000  | 0.38863200  | 1.62604900  | -3.19949300 | 1.68804500  | 0.00258400  |
| H | 0.90984900  | 2.37531100  | 3.16199300  | -0.90644700 | 3.69951000  | 1.55193400  |
| H | -0.85826500 | 2.37360000  | 3.20221200  | 0.86175500  | 3.70104200  | 1.57613200  |
| H | -0.00606900 | 2.94419200  | 1.75588600  | -0.03461000 | 2.45180600  | 2.45952200  |
| H | -0.00628900 | -1.84693300 | 2.87366300  | 0.03292200  | 2.45823000  | -2.45292200 |
| H | -0.90763500 | -0.70749500 | 3.88821300  | 0.90865400  | 3.70152200  | -1.54309600 |
| H | 0.86064700  | -0.70063400 | 3.91193900  | -0.85957800 | 3.70727100  | -1.56529500 |
| H | 5.96208600  | -3.19375400 | 3.00842700  | -5.94625100 | 2.64926700  | -3.45305200 |
| H | 8.36755300  | -2.67705200 | 2.72259300  | -8.35203400 | 2.40596600  | -2.91648600 |
| H | 9.10552800  | -1.00890600 | 1.03690000  | -9.08778900 | 0.88713700  | -1.09290200 |



|   |             |             |             |             |             |             |
|---|-------------|-------------|-------------|-------------|-------------|-------------|
| H | 4.24002800  | -2.05005500 | 1.63707300  | -4.22331800 | 1.41084200  | -2.17232500 |
| H | 9.25061500  | 0.90649700  | -0.97352000 | -9.23490200 | -0.91603800 | 1.00235000  |
| H | 8.76319300  | 2.55760200  | -2.76358100 | -8.75360400 | -2.52461900 | 2.83353200  |
| H | 6.42645100  | 3.01878000  | -3.44422900 | -6.41697100 | -3.12070200 | 3.39903800  |
| H | 4.52873700  | 1.83529600  | -2.37272700 | -4.51436100 | -2.14957800 | 2.14184500  |
| H | -5.99673800 | 4.11764800  | 1.46444700  | 5.94531800  | 2.63008700  | 3.46831200  |
| H | -8.39602400 | 3.50341800  | 1.42483400  | 8.35130500  | 2.38908600  | 2.93161100  |
| H | -9.11442300 | 1.28954800  | 0.55743500  | 9.08758800  | 0.88031400  | 1.09992700  |
| H | -4.26222400 | 2.53785100  | 0.66138900  | 4.22266400  | 1.39909500  | 2.17990900  |
| H | -9.23957000 | -1.27078500 | -0.51093400 | 9.23505900  | -0.91078100 | -1.00600500 |
| H | -8.73665300 | -3.49766700 | -1.48898400 | 8.75389800  | -2.50808800 | -2.84707800 |
| H | -6.39583300 | -4.17094900 | -1.94054400 | 6.41731200  | -3.09995300 | -3.41706000 |
| H | -4.51013400 | -2.63797300 | -1.44688100 | 4.51452000  | -2.13588900 | -2.15482400 |

**Table S11.** Optimized geometries (in Å) and energies (in hartree) of *m*-CzGeF in the ground and lowest triplet excited states.

|    | S <sub>0</sub> state |             |             | T <sub>1</sub> state  |             |             |
|----|----------------------|-------------|-------------|-----------------------|-------------|-------------|
|    | Energy = -3649.5081  |             |             | Energy = -3649.276376 |             |             |
| C  | 3.52923800           | 1.76876200  | 0.31974400  | 3.52429900            | 1.74442200  | 0.24741400  |
| C  | 2.91450000           | 0.51160100  | 0.26088500  | 2.89293600            | 0.44884800  | 0.19856900  |
| C  | 1.52453200           | 0.41641900  | 0.12724000  | 1.53033700            | 0.33478000  | 0.10438700  |
| C  | 0.74204800           | 1.57384100  | 0.06720500  | 0.69785400            | 1.50853600  | 0.05583800  |
| C  | 1.36261800           | 2.84463700  | 0.11977500  | 1.35467300            | 2.83203900  | 0.09922400  |
| C  | 2.74901600           | 2.92308000  | 0.23864300  | 2.73112300            | 2.90083500  | 0.19093700  |
| C  | -1.36255900          | 2.84463600  | -0.11962900 | -1.35522000           | 2.83174400  | -0.09994400 |
| C  | -0.74200400          | 1.57383700  | -0.06709300 | -0.69817000           | 1.50837000  | -0.05556000 |
| C  | -1.52446800          | 0.41641100  | -0.12715100 | -1.53042500           | 0.33443700  | -0.10367200 |
| C  | -2.91445600          | 0.51154800  | -0.26076600 | -2.89297900           | 0.44818500  | -0.19886000 |
| C  | -3.52917400          | 1.76873700  | -0.31956300 | -3.52452800           | 1.74363600  | -0.24917500 |
| C  | -2.74896400          | 2.92305500  | -0.23843400 | -2.73160400           | 2.90022800  | -0.19282600 |
| Ge | 0.00003100           | 4.22023800  | -0.00004200 | -0.00044500           | 4.20961100  | -0.00009600 |
| C  | -0.14085600          | 5.35155300  | 1.58275700  | -0.11732600           | 5.35859900  | 1.57651500  |
| C  | 0.14081900           | 5.35099400  | -1.58325800 | 0.11624400            | 5.36007100  | -1.57561500 |
| C  | -6.38653600          | -0.85154800 | 2.25543000  | -6.54596500           | -0.69499600 | 2.14822300  |
| C  | -6.92865500          | -2.08913700 | 1.86831000  | -7.14214800           | -1.89902200 | 1.73803200  |
| C  | -6.39100500          | -2.79194200 | 0.79396000  | -6.58822700           | -2.64709300 | 0.70172300  |
| C  | -5.30615800          | -2.24791400 | 0.09663300  | -5.43611700           | -2.17741700 | 0.06323900  |
| C  | -4.78032100          | -0.99146500 | 0.49221600  | -4.85829100           | -0.94992300 | 0.47533000  |
| C  | -5.30735100          | -0.28719200 | 1.57852400  | -5.39462100           | -0.20764600 | 1.53216400  |
| C  | -3.52919000          | -1.70692800 | -1.26330800 | -3.55082000           | -1.76603100 | -1.19436800 |
| C  | -4.51033900          | -2.70254200 | -1.02440600 | -4.60362400           | -2.69628300 | -1.00295200 |

Supplementary Material (ESI) for PCCP  
This journal is © the Owner Societies 2010

|   |             |             |             |             |             |             |
|---|-------------|-------------|-------------|-------------|-------------|-------------|
| C | -4.55140800 | -3.84002900 | -1.83916200 | -4.67048300 | -3.84011400 | -1.80541100 |
| C | -3.62949400 | -3.96718100 | -2.87395500 | -3.70176200 | -4.03829700 | -2.78565100 |
| C | -2.67258200 | -2.96412800 | -3.10539700 | -2.67449100 | -3.09854300 | -2.97379300 |
| C | -2.60963500 | -1.82229500 | -2.30948000 | -2.58389000 | -1.95285100 | -2.18580000 |
| N | -3.69953000 | -0.66932800 | -0.33781200 | -3.71520900 | -0.70091000 | -0.29508100 |
| C | 2.67286400  | -2.96384000 | 3.10573000  | 2.67728900  | -3.09546200 | 2.97678700  |
| C | 3.62966400  | -3.96697900 | 2.87420100  | 3.70443100  | -4.03532600 | 2.78848900  |
| C | 4.55145500  | -3.83997100 | 1.83927900  | 4.67224000  | -3.83793200 | 1.80718800  |
| C | 4.51040600  | -2.70251700 | 1.02447500  | 4.60459600  | -2.69477800 | 1.00383000  |
| C | 3.52935400  | -1.70681500 | 1.26348100  | 3.55192900  | -1.76441000 | 1.19544900  |
| C | 2.60991800  | -1.82203400 | 2.30977000  | 2.58591100  | -1.95043500 | 2.18791600  |
| C | 4.78019800  | -0.99153100 | -0.49228900 | 4.85777900  | -0.94964900 | -0.47616000 |
| C | 5.30607400  | -2.24798100 | -0.09671500 | 5.43605400  | -2.17677400 | -0.06359200 |
| C | 6.39082700  | -2.79201200 | -0.79418900 | 6.58760500  | -2.64689900 | -0.70275300 |
| C | 6.92830000  | -2.08924100 | -1.86865300 | 7.14053200  | -1.89963100 | -1.74017300 |
| C | 6.38613500  | -0.85166700 | -2.25574600 | 6.54392100  | -0.69595600 | -2.15077600 |
| C | 5.30704900  | -0.28728700 | -1.57869700 | 5.39312000  | -0.20816700 | -1.53405200 |
| N | 3.69959600  | -0.66930500 | 0.33790700  | 3.71543000  | -0.70004400 | 0.29512300  |
| H | 4.60594900  | 1.83226900  | 0.44128800  | 4.59901900  | 1.80643600  | 0.37378900  |
| H | 1.07788900  | -0.57045500 | 0.06108100  | 1.08716600  | -0.65353600 | 0.04637800  |
| H | 3.23912500  | 3.89317700  | 0.28398700  | 3.22481600  | 3.86993500  | 0.23200100  |
| H | -1.07777400 | -0.57043900 | -0.06102300 | -1.08710400 | -0.65374800 | -0.04461100 |
| H | -4.60588400 | 1.83228600  | -0.44109200 | -4.59915800 | 1.80538200  | -0.37642400 |
| H | -3.23909700 | 3.89314000  | -0.28380700 | -3.22544700 | 3.86921100  | -0.23483100 |
| H | -1.02582500 | 5.99185400  | 1.50640500  | -1.00654500 | 5.99468400  | 1.50967000  |
| H | 0.74094100  | 5.99593700  | 1.66108300  | 0.76306200  | 6.00794700  | 1.63150400  |
| H | -0.21898600 | 4.75026400  | 2.49197600  | -0.17606100 | 4.76728700  | 2.49375200  |
| H | -0.74121100 | 5.99501200  | -1.66198800 | -0.76390100 | 6.00983000  | -1.62960700 |
| H | 1.02554200  | 5.99165000  | -1.50706700 | 1.00572400  | 5.99575100  | -1.50840500 |
| H | 0.21928100  | 4.74934100  | -2.49220900 | 0.17444100  | 4.76969800  | -2.49348900 |
| H | -6.81389100 | -0.32190600 | 3.10265500  | -6.98354100 | -0.13366300 | 2.96925600  |
| H | -7.77139600 | -2.50089900 | 2.41625800  | -8.03714700 | -2.25348400 | 2.24129100  |
| H | -6.80476600 | -3.75372300 | 0.50193400  | -7.04135200 | -3.58685000 | 0.39702600  |
| H | -4.88816600 | 0.66387000  | 1.88991900  | -4.92728200 | 0.71111100  | 1.86985600  |
| H | -5.29740200 | -4.61163700 | -1.66718000 | -5.47225100 | -4.56097500 | -1.66813000 |
| H | -3.65029900 | -4.84640900 | -3.51152900 | -3.74100100 | -4.92417800 | -3.41301100 |
| H | -1.96632600 | -3.07704800 | -3.92346200 | -1.93189300 | -3.26532400 | -3.74924100 |
| H | -1.87448800 | -1.04790900 | -2.50195000 | -1.79162200 | -1.22924800 | -2.34251300 |
| H | 1.96670800  | -3.07667900 | 3.92389200  | 1.93541200  | -3.26163000 | 3.75305800  |
| H | 3.65045900  | -4.84619400 | 3.51179600  | 3.74428500  | -4.92067700 | 3.41655800  |
| H | 5.29735900  | -4.61166000 | 1.66726500  | 5.47391300  | -4.55887400 | 1.66978000  |
| H | 1.87487200  | -1.04755600 | 2.50225900  | 1.79374800  | -1.22673700 | 2.34472700  |

|   |            |             |             |            |             |             |
|---|------------|-------------|-------------|------------|-------------|-------------|
| H | 6.80463900 | -3.75378900 | -0.50222000 | 7.04106600 | -3.58638200 | -0.39771400 |
| H | 7.77097700 | -2.50101400 | -2.41669300 | 8.03508800 | -2.25444900 | -2.24396900 |
| H | 6.81337900 | -0.32206400 | -3.10305100 | 6.98073100 | -0.13524900 | -2.97264500 |
| H | 4.88779800 | 0.66377000  | -1.89002400 | 4.92544000 | 0.71031700  | -1.87201900 |

**Table S12.** Optimized geometries (in Å) and energies (in hartree) of *p*-CzGeF in the ground and lowest triplet excited states.

|    | S <sub>0</sub> state |             |             | T <sub>1</sub> state  |             |             |
|----|----------------------|-------------|-------------|-----------------------|-------------|-------------|
|    | Energy = -3649.5068  |             |             | Energy = -3649.284052 |             |             |
| C  | 3.54837700           | -0.57156600 | -0.01224700 | 3.53893500            | -0.56195700 | -0.00206700 |
| C  | 2.92983700           | -1.82837900 | -0.03053000 | 2.90611300            | -1.84830200 | -0.00141300 |
| C  | 1.54069700           | -1.92903700 | -0.01822900 | 1.54488700            | -1.96083700 | 0.00565900  |
| C  | 0.74300700           | -0.77769700 | -0.00741200 | 0.69927900            | -0.78597000 | 0.00357300  |
| C  | 1.36839300           | 0.49228200  | 0.00188500  | 1.36188000            | 0.52761200  | 0.00821500  |
| C  | 2.75605000           | 0.58552000  | 0.00908100  | 2.73091800            | 0.60753500  | 0.00529200  |
| C  | -1.36836900          | 0.49241800  | 0.00456200  | -1.36189900           | 0.52760400  | -0.00827300 |
| C  | -0.74312500          | -0.77763100 | -0.00490800 | -0.69928100           | -0.78597300 | -0.00372900 |
| C  | -1.54091500          | -1.92894300 | -0.01106900 | -1.54487400           | -1.96085200 | -0.00590200 |
| C  | -2.93004100          | -1.82834600 | 0.00299300  | -2.90610200           | -1.84833900 | 0.00118900  |
| C  | -3.54843700          | -0.57133200 | 0.00365400  | -3.53894000           | -0.56200500 | 0.00195200  |
| C  | -2.75602900          | 0.58585900  | -0.00090800 | -2.73093600           | 0.60750200  | -0.00533000 |
| Ge | 0.00009600           | 1.87041200  | 0.01290200  | -0.00001200           | 1.90436500  | 0.00000100  |
| C  | -0.00111100          | 2.98710700  | 1.61088900  | -0.01067900           | 3.05287200  | 1.58054800  |
| C  | 0.00143900           | 3.00822500  | -1.57010700 | 0.01070400            | 3.05282800  | -1.58057900 |
| C  | -6.28090400          | 1.57487500  | 2.85484300  | -6.26151800           | 1.87401800  | -2.61726300 |
| C  | -7.64645300          | 1.46377300  | 2.54094600  | -7.62702300           | 1.72039900  | -2.32572200 |
| C  | -8.06009500          | 0.73178700  | 1.43179700  | -8.04220200           | 0.86242600  | -1.30966400 |
| C  | -7.09822500          | 0.11176800  | 0.62561800  | -7.08013700           | 0.16662400  | -0.57179300 |
| C  | -5.72387900          | 0.24591300  | 0.94917000  | -5.70487200           | 0.35081600  | -0.86215600 |
| C  | -5.30297500          | 0.96837400  | 2.06934000  | -5.28322600           | 1.18991300  | -1.89788700 |
| C  | -5.83897500          | -1.05782300 | -0.90622900 | -5.82576200           | -1.16873900 | 0.82325500  |
| C  | -7.17148400          | -0.71785500 | -0.55894800 | -7.15741600           | -0.80418200 | 0.50166900  |
| C  | -8.22982000          | -1.18229200 | -1.34856000 | -8.21969200           | -1.36485100 | 1.21663700  |
| C  | -7.95079600          | -1.96480800 | -2.46523600 | -7.94524100           | -2.26839600 | 2.24109200  |
| C  | -6.62341300          | -2.28050800 | -2.80289300 | -6.61929400           | -2.60101500 | 2.56402800  |
| C  | -5.55160800          | -1.83209500 | -2.03385400 | -5.54290200           | -2.05314200 | 1.86839900  |
| N  | -4.96414700          | -0.46867400 | 0.01477600  | -4.94159500           | -0.46487700 | -0.01033500 |
| C  | 6.28119500           | 1.62320000  | -2.82587900 | 6.26141400            | 1.87383800  | 2.61748100  |
| C  | 7.64666900           | 1.50712900  | -2.51349000 | 7.62693400            | 1.72019500  | 2.32602600  |
| C  | 8.06017500           | 0.75627700  | -1.41698000 | 8.04215200            | 0.86228300  | 1.30993200  |
| C  | 7.09820600           | 0.12229100  | -0.62185700 | 7.08011200            | 0.16657500  | 0.57194200  |

|   |             |             |             |             |             |             |
|---|-------------|-------------|-------------|-------------|-------------|-------------|
| C | 5.72391900  | 0.26172200  | -0.94337300 | 5.70483000  | 0.35078900  | 0.86221900  |
| C | 5.30318100  | 1.00305400  | -2.05119800 | 5.28314700  | 1.18982400  | 1.89798400  |
| C | 5.83880700  | -1.07341800 | 0.88961000  | 5.82579800  | -1.16864100 | -0.82330100 |
| C | 7.17134800  | -0.72750100 | 0.54832800  | 7.15743600  | -0.80414100 | -0.50160100 |
| C | 8.22963700  | -1.20517000 | 1.33004700  | 8.21974900  | -1.36476700 | -1.21654900 |
| C | 7.95058300  | -2.00638600 | 2.43338400  | 7.94534600  | -2.26821400 | -2.24110300 |
| C | 6.62318700  | -2.32770500 | 2.76559700  | 6.61941100  | -2.60077300 | -2.56415600 |
| C | 5.55142100  | -1.86650200 | 2.00409700  | 5.54298600  | -2.05293900 | -1.86854800 |
| N | 4.96407200  | -0.46886600 | -0.02148100 | 4.94159000  | -0.46481400 | 0.01028000  |
| H | 3.54318100  | -2.72332900 | -0.06703000 | 3.52866700  | -2.73685300 | 0.03415900  |
| H | 1.08933300  | -2.91704700 | -0.03348100 | 1.09653200  | -2.94944700 | 0.03261500  |
| H | 3.24590200  | 1.55505100  | 0.03981800  | 3.22487500  | 1.57553200  | -0.02010900 |
| H | -1.08962100 | -2.91710100 | -0.01062800 | -1.09650200 | -2.94945300 | -0.03294000 |
| H | -3.54351500 | -2.72366500 | 0.02600500  | -3.52863900 | -2.73689900 | -0.03445400 |
| H | -3.24583400 | 1.55576600  | -0.01726400 | -3.22491600 | 1.57548600  | 0.02013700  |
| H | -0.88904300 | 3.62772700  | 1.61785400  | -0.89799600 | 3.69494200  | 1.56882400  |
| H | 0.88464300  | 3.63069300  | 1.61613100  | 0.87589700  | 3.69612400  | 1.58125900  |
| H | 0.00181700  | 2.37791800  | 2.51817700  | -0.01804100 | 2.46085400  | 2.49918000  |
| H | -0.00118100 | 2.41083200  | -2.48521200 | 0.01790200  | 2.46075100  | -2.49917700 |
| H | -0.88444900 | 3.65164100  | -1.56721900 | -0.87576400 | 3.69622600  | -1.58127100 |
| H | 0.88929100  | 3.64899400  | -1.56857500 | 0.89813700  | 3.69473900  | -1.56896300 |
| H | -5.97790600 | 2.14291900  | 3.73032800  | -5.95782200 | 2.53464600  | -3.42467300 |
| H | -8.38383200 | 1.95026000  | 3.17308900  | -8.36472400 | 2.26837200  | -2.90486600 |
| H | -9.11704800 | 0.63819100  | 1.19600900  | -9.09991100 | 0.72921200  | -1.09820000 |
| H | -4.25142800 | 1.05069600  | 2.32374600  | -4.23278000 | 1.29880500  | -2.14350100 |
| H | -9.25613200 | -0.93006300 | -1.09447700 | -9.24536500 | -1.09280600 | 0.98162800  |
| H | -8.76394400 | -2.33204500 | -3.08485900 | -8.76219700 | -2.71216400 | 2.80280900  |
| H | -6.42502900 | -2.88490600 | -3.68395500 | -6.42424100 | -3.29394900 | 3.37786700  |
| H | -4.52922800 | -2.07141500 | -2.30710300 | -4.52203900 | -2.29795200 | 2.13981500  |
| H | 5.97833000  | 2.20603600  | -3.69163400 | 5.95768100  | 2.53441500  | 3.42491900  |
| H | 8.38409200  | 2.00463100  | -3.13695000 | 8.36461300  | 2.26810100  | 2.90526200  |
| H | 9.11707500  | 0.65886400  | -1.18251300 | 9.09986900  | 0.72904600  | 1.09852500  |
| H | 4.25171200  | 1.08931500  | -2.30456600 | 4.23269000  | 1.29873700  | 2.14354300  |
| H | 9.25595700  | -0.94863400 | 1.08034700  | 9.24541200  | -1.09276600 | -0.98144400 |
| H | 8.76371000  | -2.38398100 | 3.04677300  | 8.76232700  | -2.71195100 | -2.80280800 |
| H | 6.42472400  | -2.94680500 | 3.63637300  | 6.42439600  | -3.29362600 | -3.37807300 |
| H | 4.52905500  | -2.11044000 | 2.27328900  | 4.52213500  | -2.29769600 | -2.14005800 |

**Table S13.** Optimized geometries (in Å) and energies (in hartree) of *m*-CzNF in the ground and lowest triplet excited states.

|   | S <sub>0</sub> state |             |             | T <sub>1</sub> state  |             |             |
|---|----------------------|-------------|-------------|-----------------------|-------------|-------------|
|   | Energy = -1589.3238  |             |             | Energy = -1589.101526 |             |             |
| C | 1.12350300           | 2.94448700  | 0.06701900  | 1.14702800            | 2.93115200  | -0.09600800 |
| C | 2.47375900           | 3.30136000  | 0.13209600  | 2.48209300            | 3.29996700  | -0.20691500 |
| C | 3.41666700           | 2.28076400  | 0.20088500  | 3.45210800            | 2.27712700  | -0.25732200 |
| C | 3.03309700           | 0.92429700  | 0.17778300  | 3.04733700            | 0.92200700  | -0.21047000 |
| C | 1.68519400           | 0.57168000  | 0.09461900  | 1.69481000            | 0.54221800  | -0.11063400 |
| C | 0.72084800           | 1.58215800  | 0.04790700  | 0.71064600            | 1.55339500  | -0.05379000 |
| C | -0.72388100          | 1.58092800  | -0.04188700 | -0.70509300           | 1.56217200  | 0.06338100  |
| C | -1.12827300          | 2.94256300  | -0.07002000 | -1.11911100           | 2.93058300  | 0.08196700  |
| N | -0.00398600          | 3.75396500  | 0.01352800  | 0.02254200            | 3.72632800  | 0.00004000  |
| C | -1.68686400          | 0.56885600  | -0.08312200 | -1.69941800           | 0.55905200  | 0.14256800  |
| C | -3.03441300          | 0.91908500  | -0.18048900 | -3.06546100           | 0.96402900  | 0.22910800  |
| C | -3.41872700          | 2.27480400  | -0.22783600 | -3.44215600           | 2.30404000  | 0.23648600  |
| C | -2.47743500          | 3.29715700  | -0.16474700 | -2.44621100           | 3.32420100  | 0.16172100  |
| C | -0.00235300          | 5.20111900  | -0.03468200 | 0.01741000            | 5.17628500  | -0.02027500 |
| C | -4.15112600          | -1.07458100 | -1.22792700 | -4.03650200           | -1.16943800 | 1.12171600  |
| C | -3.36642000          | -1.28499700 | -2.36512700 | -3.11728800           | -1.52117100 | 2.11552200  |
| C | -3.71438100          | -2.33985800 | -3.20608100 | -3.35083100           | -2.69505700 | 2.82960500  |
| C | -4.81759000          | -3.16579900 | -2.92815300 | -4.47767700           | -3.49464700 | 2.57729500  |
| C | -5.60060300          | -2.94528800 | -1.79876400 | -5.40463000           | -3.12508700 | 1.60501200  |
| C | -5.27397200          | -1.89170900 | -0.93670100 | -5.19065200           | -1.95416600 | 0.87227700  |
| C | -5.85868900          | -1.37983800 | 0.28525200  | -5.94509600           | -1.27551600 | -0.16203200 |
| C | -5.06664900          | -0.27300400 | 0.68607100  | -5.22322300           | -0.10175300 | -0.49601400 |
| N | -4.03293300          | -0.09408300 | -0.23784900 | -4.05808200           | -0.04352000 | 0.28516800  |
| C | -6.95724900          | -1.75817200 | 1.06608600  | -7.13647000           | -1.57123500 | -0.83097200 |
| C | -7.24631800          | -1.04168800 | 2.22396300  | -7.58855900           | -0.70632500 | -1.82483600 |
| C | -6.44413800          | 0.04593900  | 2.61120900  | -6.85180200           | 0.44167100  | -2.15977400 |
| C | -5.34533400          | 0.44412900  | 1.85281100  | -5.66236000           | 0.75884500  | -1.50655400 |
| C | 5.05732500           | -0.27951800 | -0.69296200 | 5.23647700            | -0.10394600 | 0.46217300  |
| C | 5.32365400           | 0.42024500  | -1.87307400 | 5.70340800            | 0.78803700  | 1.43241600  |
| C | 6.41527100           | 0.01167200  | -2.63631200 | 6.92567000            | 0.50636800  | 2.04038200  |
| C | 7.22243600           | -1.06926100 | -2.24074800 | 7.66363600            | -0.64024200 | 1.70528600  |
| C | 6.94567900           | -1.76849100 | -1.06940000 | 7.18065300            | -1.54004400 | 0.75756200  |
| C | 5.85454000           | -1.37947500 | -0.28343000 | 5.95820700            | -1.27826400 | 0.13300700  |
| C | 5.28269400           | -1.87336900 | 0.95192700  | 5.16760800            | -2.00010700 | -0.84401800 |
| C | 4.16192300           | -1.05299800 | 1.24195700  | 3.99138700            | -1.24138300 | -1.06591700 |
| N | 4.03273800           | -0.08769500 | 0.23843900  | 4.03629500            | -0.08377600 | -0.26943500 |
| C | 5.61913500           | -2.91332600 | 1.82670500  | 5.36977000            | -3.19038500 | -1.54780500 |
| C | 4.84772900           | -3.11726100 | 2.96713700  | 4.40847300            | -3.60494000 | -2.46711900 |
| C | 3.74631600           | -2.28835200 | 3.24339200  | 3.25983200            | -2.83034100 | -2.69555100 |
| C | 3.38870500           | -1.24687200 | 2.38991300  | 3.03701300            | -1.63876100 | -2.00749800 |

|   |             |             |             |             |             |             |
|---|-------------|-------------|-------------|-------------|-------------|-------------|
| H | 2.79093400  | 4.33951600  | 0.13728000  | 2.78434800  | 4.33983400  | -0.27875100 |
| H | 4.47193500  | 2.52320300  | 0.27605900  | 4.49438400  | 2.51956300  | -0.42085300 |
| H | 1.40374800  | -0.47642100 | 0.05891000  | 1.43245000  | -0.50372900 | -0.00586800 |
| H | -1.40428600 | -0.47851100 | -0.03661900 | -1.45347700 | -0.49232900 | 0.05612100  |
| H | -4.47274000 | 2.51484500  | -0.32497100 | -4.48379500 | 2.57377000  | 0.35999800  |
| H | -2.79405300 | 4.33458400  | -0.20843100 | -2.73740100 | 4.36920300  | 0.18032000  |
| H | 0.84651800  | 5.58577900  | 0.53644100  | 0.96499700  | 5.54852600  | 0.37344600  |
| H | 0.06142200  | 5.58049300  | -1.06295700 | -0.12322300 | 5.55803000  | -1.03870500 |
| H | -0.91665200 | 5.58381500  | 0.42621200  | -0.79234700 | 5.54577100  | 0.61309400  |
| H | -2.51720200 | -0.64703400 | -2.58765600 | -2.25550100 | -0.89852300 | 2.32696800  |
| H | -3.11890100 | -2.52466300 | -4.09616700 | -2.64690900 | -2.99081000 | 3.60266200  |
| H | -5.06048000 | -3.98143600 | -3.60329700 | -4.63169100 | -4.40299100 | 3.15282300  |
| H | -6.45710000 | -3.58111900 | -1.58946900 | -6.28611200 | -3.73446600 | 1.42348500  |
| H | -7.57446100 | -2.60348600 | 0.77267600  | -7.69772300 | -2.46843300 | -0.58335100 |
| H | -8.09690100 | -1.32598500 | 2.83700800  | -8.51412700 | -0.92369300 | -2.35033900 |
| H | -6.68198400 | 0.58775200  | 3.52278900  | -7.21270800 | 1.09853000  | -2.94656600 |
| H | -4.72469100 | 1.27968400  | 2.16014800  | -5.09270700 | 1.64054100  | -1.77643700 |
| H | 4.69914400  | 1.25056100  | -2.18673100 | 5.13070100  | 1.66578600  | 1.70805000  |
| H | 6.64345400  | 0.53989800  | -3.55827600 | 7.30919100  | 1.18873200  | 2.79394100  |
| H | 8.06717100  | -1.36198800 | -2.85789900 | 8.61328900  | -0.83136300 | 2.19682700  |
| H | 7.56671700  | -2.60868500 | -0.76942400 | 7.74183600  | -2.43807600 | 0.51320700  |
| H | 6.47421500  | -3.55145000 | 1.61858800  | 6.26845100  | -3.77960100 | -1.38554400 |
| H | 5.09836000  | -3.92217200 | 3.65225500  | 4.55212500  | -4.52927700 | -3.01928200 |
| H | 3.15993300  | -2.46019100 | 4.14207300  | 2.52805100  | -3.16046600 | -3.42761100 |
| H | 2.54082100  | -0.60662600 | 2.61100200  | 2.15645700  | -1.03778300 | -2.20191400 |

**Table S14.** Optimized geometries (in Å) and energies (in hartree) of *p*-CzNF in the ground and lowest triplet excited states.

|   | S <sub>0</sub> state |             |             | T <sub>1</sub> state  |             |             |
|---|----------------------|-------------|-------------|-----------------------|-------------|-------------|
|   | Energy = -1589.3242  |             |             | Energy = -1589.101242 |             |             |
| C | -1.12829300          | -0.01603400 | 0.15637700  | 1.13487700            | 0.19567600  | -0.01104100 |
| C | -2.47515900          | 0.00208500  | 0.52338800  | 2.45479400            | 0.55033000  | 0.04675400  |
| C | -3.42915600          | 0.03302000  | -0.49829100 | 3.43377100            | -0.51380000 | 0.05547700  |
| C | -3.04390100          | 0.04042000  | -1.85448200 | 3.02851800            | -1.87304200 | 0.03358700  |
| C | -1.69956800          | 0.00969700  | -2.20806100 | 1.69788100            | -2.22920200 | 0.00137300  |
| C | -0.72384800          | -0.01224700 | -1.20592400 | 0.69317400            | -1.19148000 | -0.02629400 |
| C | 0.72183600           | -0.03275200 | -1.20694400 | -0.68969900           | -1.19265900 | -0.06997100 |
| C | 1.12781100           | -0.05180600 | 0.15474700  | -1.13323200           | 0.19423100  | -0.08822500 |
| N | -0.00001300          | -0.05869200 | 0.96618500  | 0.00051600            | 1.00103300  | -0.07724700 |
| C | 1.69656700           | -0.03550100 | -2.21025200 | -1.69368000           | -2.23089800 | -0.08747700 |
| C | 3.04156200           | -0.05796300 | -1.85846400 | -3.02466200           | -1.87567100 | -0.09247600 |
| C | 3.42847300           | -0.05793500 | -0.50270900 | -3.43198500           | -0.51614500 | -0.09393900 |

Supplementary Material (ESI) for PCCP  
This journal is © the Owner Societies 2010

|   |             |             |             |             |             |             |
|---|-------------|-------------|-------------|-------------|-------------|-------------|
| C | 2.47521000  | -0.04712000 | 0.52028800  | -2.45518800 | 0.54794800  | -0.09662100 |
| C | 0.00198700  | -0.03233100 | 2.41426000  | -0.00438300 | 2.44647600  | -0.06853200 |
| C | 5.76003800  | 0.86987000  | -0.59488700 | -5.77470000 | -0.72757800 | 0.77093400  |
| C | 5.58970700  | 2.01031500  | -1.38490500 | -5.62746200 | -1.64847500 | 1.81243400  |
| C | 6.71352500  | 2.79086100  | -1.64727000 | -6.76641900 | -1.99727400 | 2.53599800  |
| C | 7.97746600  | 2.45266900  | -1.13350300 | -8.02081100 | -1.43714800 | 2.24258400  |
| C | 8.13802800  | 1.32338900  | -0.33609900 | -8.15650500 | -0.50039100 | 1.22023600  |
| C | 7.02512800  | 0.52147900  | -0.05645500 | -7.02933700 | -0.13577600 | 0.47827600  |
| C | 6.83051600  | -0.67950200 | 0.72863600  | -6.80903400 | 0.80458000  | -0.60224600 |
| C | 5.45444600  | -1.01195700 | 0.63714200  | -5.42987900 | 0.74374700  | -0.92528600 |
| N | 4.81020400  | -0.06615600 | -0.16907600 | -4.80026200 | -0.18950200 | -0.08615800 |
| C | 7.68834700  | -1.49322200 | 1.47791900  | -7.65162800 | 1.65508500  | -1.32353500 |
| C | 7.17295100  | -2.61887000 | 2.11391900  | -7.11724000 | 2.42319000  | -2.35608500 |
| C | 5.80960200  | -2.94164300 | 2.00093300  | -5.75345900 | 2.33396300  | -2.68039000 |
| C | 4.93376200  | -2.14841100 | 1.26266100  | -4.89348500 | 1.49076500  | -1.97876400 |
| C | -5.43914800 | 1.01964600  | 0.64310100  | 5.40750600  | 0.73990700  | 0.95098300  |
| C | -4.89991900 | 2.14738500  | 1.26869600  | 4.84357800  | 1.47161500  | 2.00079400  |
| C | -5.76279700 | 2.95476000  | 2.00688600  | 5.68391500  | 2.30819200  | 2.73352100  |
| C | -7.13125700 | 2.65427600  | 2.11973700  | 7.05481200  | 2.40509900  | 2.44336300  |
| C | -7.66491000 | 1.53706800  | 1.48388300  | 7.61632000  | 1.65160700  | 1.41437100  |
| C | -6.82044700 | 0.70942200  | 0.73468800  | 6.79386600  | 0.80828600  | 0.66210500  |
| C | -7.03447200 | -0.48821500 | -0.05043800 | 7.04284900  | -0.11820000 | -0.42429500 |
| C | -5.77515400 | -0.85680000 | -0.58905000 | 5.79732100  | -0.70955300 | -0.75433700 |
| N | -4.81047600 | 0.06355900  | -0.16309400 | 4.80094500  | -0.18448600 | 0.08540000  |
| C | -8.16000300 | -1.27226900 | -0.33014900 | 8.18851400  | -0.47118700 | -1.14315100 |
| C | -8.01751800 | -2.40379700 | -1.12783000 | 8.08002600  | -1.39612500 | -2.17947000 |
| C | -6.75922900 | -2.76188400 | -1.64206000 | 6.83468100  | -1.95592600 | -2.50966200 |
| C | -5.62309300 | -1.99939000 | -1.37969400 | 5.67766500  | -1.61853400 | -1.80968500 |
| H | -2.79432200 | -0.01454100 | 1.55978300  | 2.78502800  | 1.58215800  | 0.03387000  |
| H | -3.81291900 | 0.08752900  | -2.61814900 | 3.79412100  | -2.64067800 | 0.08621600  |
| H | -1.41377100 | 0.01965000  | -3.25634400 | 1.40345600  | -3.27336700 | 0.01534700  |
| H | 1.40973900  | -0.03186900 | -3.25829900 | -1.39892800 | -3.27482200 | -0.11103900 |
| H | 3.81002900  | -0.08723200 | -2.62353900 | -3.79054000 | -2.64362700 | -0.13504900 |
| H | 2.79515100  | -0.01540100 | 1.55604000  | -2.78469600 | 1.57869300  | -0.04261000 |
| H | 0.88108900  | -0.56319300 | 2.78852200  | -0.86098900 | 2.81166100  | -0.64245700 |
| H | -0.88567200 | -0.54640200 | 2.79179100  | 0.90545400  | 2.81776300  | -0.54815300 |
| H | 0.01281200  | 0.99199800  | 2.80895600  | -0.06074900 | 2.85686100  | 0.94876800  |
| H | 4.61567100  | 2.28183500  | -1.77803200 | -4.65951400 | -2.07061600 | 2.05797500  |
| H | 6.60650100  | 3.68140100  | -2.26080000 | -6.67705400 | -2.71372300 | 3.34799000  |
| H | 8.83410500  | 3.08163700  | -1.35849800 | -8.88964500 | -1.73074800 | 2.82474300  |
| H | 9.11414400  | 1.06838900  | 0.06850800  | -9.12384700 | -0.05315600 | 1.00686100  |
| H | 8.74483500  | -1.25027500 | 1.55749100  | -8.71125900 | 1.70928200  | -1.08783600 |

|   |             |             |             |             |             |             |
|---|-------------|-------------|-------------|-------------|-------------|-------------|
| H | 7.82891600  | -3.25712300 | 2.69905500  | -7.76190300 | 3.08847000  | -2.92333800 |
| H | 5.42783500  | -3.83055000 | 2.49607500  | -5.35872900 | 2.92675500  | -3.50108000 |
| H | 3.88472800  | -2.40972300 | 1.17069400  | -3.84680800 | 1.40934700  | -2.24952900 |
| H | -3.84670300 | 2.39134900  | 1.17697200  | 3.79110800  | 1.38341400  | 2.24575100  |
| H | -5.36661800 | 3.83725900  | 2.50216400  | 5.26780300  | 2.88929900  | 3.55198400  |
| H | -7.77677800 | 3.30320800  | 2.70474600  | 7.68369300  | 3.06461300  | 3.03456400  |
| H | -8.72522500 | 1.31139600  | 1.56346500  | 8.68122800  | 1.71139000  | 1.20534900  |
| H | -9.13192500 | -1.00186400 | 0.07456500  | 9.14925500  | -0.02422600 | -0.90129400 |
| H | -8.88409100 | -3.01902800 | -1.35277600 | 8.96346300  | -1.68056300 | -2.74392800 |
| H | -6.66656100 | -3.65375300 | -2.25599900 | 6.76693000  | -2.66300600 | -3.33188400 |
| H | -4.65351900 | -2.28595100 | -1.77325900 | 4.71702800  | -2.04031000 | -2.08305200 |

**Table S15.** Optimized geometries (in Å) and energies (in hartree) of *m*-CzPF in the ground and lowest triplet excited states.

|   | S <sub>0</sub> state |             |             | T <sub>1</sub> state  |             |             |
|---|----------------------|-------------|-------------|-----------------------|-------------|-------------|
|   | Energy = -1875.9218  |             |             | Energy = -1875.687982 |             |             |
| C | -1.27847800          | 3.15184900  | -0.39192600 | -1.25074400           | 3.16153300  | -0.26046500 |
| C | -2.65964900          | 3.30932000  | -0.51256400 | -2.62007800           | 3.32420100  | -0.30280100 |
| C | -3.49421700          | 2.19217200  | -0.50365200 | -3.47920100           | 2.22140700  | -0.15198300 |
| C | -2.94870600          | 0.90509400  | -0.37470800 | -2.92599300           | 0.89797900  | 0.02298800  |
| C | -1.56488900          | 0.73669200  | -0.25808700 | -1.56963100           | 0.69575200  | 0.03789100  |
| C | -0.72691600          | 1.85564000  | -0.27098100 | -0.67495900           | 1.81059100  | -0.11321400 |
| C | 0.73946200           | 1.86329000  | -0.14251900 | 0.71274800            | 1.78918500  | -0.21658400 |
| C | 1.29073800           | 3.16503200  | -0.17082500 | 1.30484500            | 3.11968200  | -0.42659200 |
| P | 0.01402800           | 4.45829700  | -0.45313400 | 0.04367300            | 4.46158900  | -0.41010600 |
| C | 1.57711700           | 0.75160800  | -0.01355900 | 1.58814600            | 0.65056500  | -0.15446300 |
| C | 2.95735800           | 0.93513100  | 0.12243000  | 2.93991900            | 0.81412000  | -0.32820300 |
| C | 3.50182600           | 2.22901900  | 0.10645600  | 3.50294400            | 2.11612900  | -0.57785900 |
| C | 2.67112500           | 3.33647800  | -0.06177600 | 2.66501300            | 3.24440700  | -0.62325000 |
| C | -0.13790000          | 5.22246900  | 1.25343000  | 0.16653500            | 5.04021400  | 1.38064700  |
| C | 3.68573900           | -1.18278700 | 1.25660500  | 3.67014500            | -1.47991200 | -1.06060500 |
| C | 2.76164500           | -1.29170100 | 2.29937900  | 2.67642200            | -1.83921800 | -1.97522200 |
| C | 2.87850400           | -2.38237200 | 3.15861700  | 2.79367000            | -3.07473300 | -2.60907100 |
| C | 3.89221300           | -3.34135700 | 2.99179900  | 3.87252100            | -3.93493400 | -2.34487300 |
| C | 4.81785900           | -3.21993000 | 1.95960900  | 4.86727400            | -3.56555800 | -1.44337400 |
| C | 4.72341900           | -2.13335600 | 1.08230900  | 4.77435600            | -2.32908400 | -0.79592000 |
| C | 5.50591700           | -1.69781700 | -0.05566100 | 5.61966100            | -1.63784900 | 0.15630800  |
| C | 4.91567900           | -0.49737100 | -0.52660800 | 4.99757800            | -0.39372500 | 0.43060000  |
| N | 3.80904700           | -0.19024200 | 0.27549400  | 3.81542100            | -0.29931500 | -0.31528800 |
| C | 6.62771500           | -2.21833300 | -0.71118300 | 6.81600600            | -1.96831700 | 0.80049500  |
| C | 7.13802500           | -1.54796200 | -1.81902800 | 7.36941800            | -1.06726400 | 1.70730100  |



Supplementary Material (ESI) for PCCP  
This journal is © the Owner Societies 2010

|   |             |             |             |             |             |             |
|---|-------------|-------------|-------------|-------------|-------------|-------------|
| C | 6.53220500  | -0.36692400 | -2.28090900 | 6.72991600  | 0.15254800  | 1.98362500  |
| C | 5.41504400  | 0.17297700  | -1.64685200 | 5.53463800  | 0.50376200  | 1.35865000  |
| C | -4.87599000 | -0.43559000 | 0.51323500  | -4.94013100 | -0.46183700 | -0.58157200 |
| C | -5.33469900 | 0.36762600  | 1.56087900  | -5.36928200 | 0.15880700  | -1.75893500 |
| C | -6.42227000 | -0.09082200 | 2.30158000  | -6.51538700 | -0.34147200 | -2.37474200 |
| C | -7.03854400 | -1.32071900 | 2.01401900  | -7.20909900 | -1.44243000 | -1.84615400 |
| C | -6.56861500 | -2.12229600 | 0.97777800  | -6.76022700 | -2.07395200 | -0.68823100 |
| C | -5.47687400 | -1.68579500 | 0.21819500  | -5.61611700 | -1.58812800 | -0.04825900 |
| C | -4.73665100 | -2.25759300 | -0.88735700 | -4.87460400 | -2.00734600 | 1.12409900  |
| C | -3.71276800 | -1.33414900 | -1.21887800 | -3.77543800 | -1.12183000 | 1.25600600  |
| N | -3.80398200 | -0.22809000 | -0.36399300 | -3.82527200 | -0.17670000 | 0.21853900  |
| C | -4.85737300 | -3.44508100 | -1.61864500 | -5.05623900 | -3.02915300 | 2.06156700  |
| C | -3.97129600 | -3.69154200 | -2.66319200 | -4.15355400 | -3.15100500 | 3.11493400  |
| C | -2.97150600 | -2.75847800 | -2.98753200 | -3.07949700 | -2.25464700 | 3.24150600  |
| C | -2.82889300 | -1.56928000 | -2.27564300 | -2.87505600 | -1.23016900 | 2.31903200  |
| H | -3.09457400 | 4.29873600  | -0.63046700 | -3.05203300 | 4.31394200  | -0.43172600 |
| H | -4.56776400 | 2.30470600  | -0.61600800 | -4.55356400 | 2.35510300  | -0.10519200 |
| H | -1.16191300 | -0.26479800 | -0.14277700 | -1.17698900 | -0.31103300 | 0.13511600  |
| H | 1.17682700  | -0.25741400 | -0.02446500 | 1.18694600  | -0.33743500 | 0.04629900  |
| H | 4.57252100  | 2.35620700  | 0.23006200  | 4.56560300  | 2.20379000  | -0.77190400 |
| H | 3.10803200  | 4.33153000  | -0.09340100 | 3.10523800  | 4.22011600  | -0.81606100 |
| H | 0.73154700  | 5.86337100  | 1.43256000  | 1.07077900  | 5.64865500  | 1.49351500  |
| H | -1.03116900 | 5.85508300  | 1.27959900  | -0.69905200 | 5.67279900  | 1.60679200  |
| H | -0.20296100 | 4.47117200  | 2.04533600  | 0.20034200  | 4.20788700  | 2.09013200  |
| H | 1.98193800  | -0.55079800 | 2.44197500  | 1.84401300  | -1.17862300 | -2.19091400 |
| H | 2.16998200  | -2.48930100 | 3.97551500  | 2.03152600  | -3.37564000 | -3.32261100 |
| H | 3.95429100  | -4.18154100 | 3.67748100  | 3.93154200  | -4.89368700 | -2.85200100 |
| H | 5.60753400  | -3.95675900 | 1.83757800  | 5.70840800  | -4.22574900 | -1.24858700 |
| H | 7.09099300  | -3.13726200 | -0.36134900 | 7.30344200  | -2.91896000 | 0.60076200  |
| H | 8.00888400  | -1.94168100 | -2.33530300 | 8.29853800  | -1.31293900 | 2.21355700  |
| H | 6.93914400  | 0.13729600  | -3.15327000 | 7.16889300  | 0.83537800  | 2.70587600  |
| H | 4.94698700  | 1.07934600  | -2.01642900 | 5.03563300  | 1.43767300  | 1.59389200  |
| H | -4.85883100 | 1.31397100  | 1.79590800  | -4.82526600 | 0.99360800  | -2.18730200 |
| H | -6.79770800 | 0.51710900  | 3.12033000  | -6.87087800 | 0.12683500  | -3.28841400 |
| H | -7.88586400 | -1.64872400 | 2.60936700  | -8.09696900 | -1.81050200 | -2.35216200 |
| H | -7.03949200 | -3.07806900 | 0.76284000  | -7.28789400 | -2.93726600 | -0.29146800 |
| H | -5.63657000 | -4.16279900 | -1.37538500 | -5.89462300 | -3.71479500 | 1.97116500  |
| H | -4.05411200 | -4.61025100 | -3.23681100 | -4.28177500 | -3.94262300 | 3.84755500  |
| H | -2.29479000 | -2.96442400 | -3.81237100 | -2.39024300 | -2.35930500 | 4.07485000  |
| H | -2.06093300 | -0.84968600 | -2.53941500 | -2.04685100 | -0.53888300 | 2.42801300  |

**Table S16.** Optimized geometries (in Å) and energies (in hartree) of *p*-CzPF in the ground and lowest triplet excited states.

|   | S <sub>0</sub> state<br>Energy = -1875.9206 |             |             | T <sub>1</sub> state<br>Energy = -1875.694241 |             |             |
|---|---------------------------------------------|-------------|-------------|-----------------------------------------------|-------------|-------------|
| C | 1.29106700                                  | 0.04772800  | 0.55287900  | 1.28466800                                    | 0.52899700  | 0.26616000  |
| C | 2.67244800                                  | 0.09873700  | 0.72484400  | 2.64227500                                    | 0.62560000  | 0.42814900  |
| C | 3.51796500                                  | -0.14536600 | -0.36625800 | 3.50886000                                    | -0.33409300 | -0.17078800 |
| C | 2.96873100                                  | -0.47013300 | -1.61673700 | 2.94928000                                    | -1.41834700 | -0.92268800 |
| C | 1.58914700                                  | -0.55281300 | -1.78223200 | 1.59685900                                    | -1.55319300 | -1.06999400 |
| C | 0.73583200                                  | -0.28466400 | -0.70488500 | 0.69648900                                    | -0.58724700 | -0.48118900 |
| C | -0.73278500                                 | -0.29474500 | -0.70349200 | -0.69333100                                   | -0.57963300 | -0.49856500 |
| C | -1.29047200                                 | 0.02460600  | 0.55648100  | -1.28750900                                   | 0.54782100  | 0.22672300  |
| P | 0.00024100                                  | 0.26261800  | 1.84736700  | -0.00296100                                   | 1.67481500  | 0.91799800  |
| C | -1.58438300                                 | -0.56961400 | -1.78050900 | -1.58919100                                   | -1.54214500 | -1.09960900 |
| C | -2.96468000                                 | -0.52343600 | -1.60789300 | -2.94274900                                   | -1.41056100 | -0.95827900 |
| C | -3.51637500                                 | -0.19324500 | -0.35970500 | -3.50837800                                   | -0.31999500 | -0.22090700 |
| C | -2.67191600                                 | 0.07481500  | 0.72661800  | -2.64697600                                   | 0.65070300  | 0.36804800  |
| C | -0.01276200                                 | 2.12481500  | 2.06516600  | 0.02840600                                    | 3.01933400  | -0.40177700 |
| C | -5.80892800                                 | 0.63336900  | -0.96057300 | -5.78310100                                   | -1.23635100 | 0.28249200  |
| C | -5.53646100                                 | 1.52808800  | -1.99914100 | -5.49650800                                   | -2.55100500 | 0.66154800  |
| C | -6.61358300                                 | 2.19235200  | -2.58235900 | -6.56609100                                   | -3.37112800 | 1.01692600  |
| C | -7.93122800                                 | 1.97919000  | -2.14244400 | -7.88730500                                   | -2.89456600 | 1.01105500  |
| C | -8.19462300                                 | 1.09738400  | -1.09826200 | -8.16328600                                   | -1.57464800 | 0.66001300  |
| C | -7.13070600                                 | 0.41719600  | -0.49437500 | -7.10810800                                   | -0.73319900 | 0.29654900  |
| C | -7.04173600                                 | -0.53032200 | 0.59718600  | -7.03177200                                   | 0.66414100  | -0.08166300 |
| C | -5.66920000                                 | -0.85081000 | 0.75355100  | -5.66379300                                   | 0.95361800  | -0.31454300 |
| N | -4.92513200                                 | -0.14030800 | -0.19749400 | -4.90370000                                   | -0.20669900 | -0.09174800 |
| C | -7.99008800                                 | -1.13312500 | 1.43183600  | -7.99077300                                   | 1.66503500  | -0.26056300 |
| C | -7.56486900                                 | -2.04210900 | 2.39618800  | -7.58043400                                   | 2.93044300  | -0.67509900 |
| C | -6.20191000                                 | -2.35883900 | 2.52794800  | -6.22405000                                   | 3.19482300  | -0.92613200 |
| C | -5.23727100                                 | -1.77316400 | 1.71067200  | -5.24917900                                   | 2.21302100  | -0.75740500 |
| C | 5.63960700                                  | 1.03124900  | 0.27905700  | 5.59105300                                    | -0.01174200 | 1.18450000  |
| C | 5.17129200                                  | 2.28703100  | 0.67531700  | 5.08840100                                    | 0.09411700  | 2.48448900  |
| C | 6.10982600                                  | 3.22440000  | 1.10191200  | 6.00274000                                    | 0.28498800  | 3.51911100  |
| C | 7.48287500                                  | 2.92590000  | 1.13051700  | 7.38354500                                    | 0.35659300  | 3.27198400  |
| C | 7.94432100                                  | 1.67792500  | 0.72198900  | 7.87986400                                    | 0.22512100  | 1.97665900  |
| C | 7.02271700                                  | 0.71798700  | 0.28796000  | 6.98310100                                    | 0.03491300  | 0.92162100  |
| C | 7.15032700                                  | -0.63546400 | -0.21092300 | 7.14931700                                    | -0.16122700 | -0.50511700 |
| C | 5.84003500                                  | -1.09073900 | -0.50567800 | 5.85137500                                    | -0.31694600 | -1.05306600 |
| N | 4.92629500                                  | -0.07246700 | -0.20526000 | 4.90255300                                    | -0.22739400 | -0.02130700 |
| C | 8.23984300                                  | -1.48956800 | -0.41772700 | 8.26422900                                    | -0.19952700 | -1.34700500 |
| C | 8.01245400                                  | -2.77403800 | -0.90308500 | 8.07423600                                    | -0.38188000 | -2.71541000 |

|   |             |             |             |             |             |             |
|---|-------------|-------------|-------------|-------------|-------------|-------------|
| C | 6.70576800  | -3.21391100 | -1.17592300 | 6.78030100  | -0.51057700 | -3.24625200 |
| C | 5.60383000  | -2.38408200 | -0.97980100 | 5.65245200  | -0.47310300 | -2.42793400 |
| H | 3.10998900  | 0.31055000  | 1.69627300  | 3.07981500  | 1.45447900  | 0.97785700  |
| H | 3.63295500  | -0.64782400 | -2.45652500 | 3.62108100  | -2.16199700 | -1.33967600 |
| H | 1.18375800  | -0.80841000 | -2.75758100 | 1.19612200  | -2.40104300 | -1.61809300 |
| H | -1.17749900 | -0.83093200 | -2.75371700 | -1.18536000 | -2.36629600 | -1.68067400 |
| H | -3.62835200 | -0.75766500 | -2.43409000 | -3.61344000 | -2.11695500 | -1.43725800 |
| H | -3.10974900 | 0.32734800  | 1.68812400  | -3.08670500 | 1.45336900  | 0.95350900  |
| H | 0.87024700  | 2.41856800  | 2.64208100  | 0.92184700  | 3.63645600  | -0.25620200 |
| H | -0.01788400 | 2.66007500  | 1.11160700  | 0.03405200  | 2.61014000  | -1.41648000 |
| H | -0.89878100 | 2.40680300  | 2.64315800  | -0.85096700 | 3.66024900  | -0.27397200 |
| H | -4.52127700 | 1.70610400  | -2.33819500 | -4.47749400 | -2.92039800 | 0.69166000  |
| H | -6.42666600 | 2.89177500  | -3.39275400 | -6.36870500 | -4.39807100 | 1.31165800  |
| H | -8.74911700 | 2.51142700  | -2.61968000 | -8.69889600 | -3.55883100 | 1.29371000  |
| H | -9.21306500 | 0.94143900  | -0.75200100 | -9.18390700 | -1.20157700 | 0.67684600  |
| H | -9.04554300 | -0.89691500 | 1.32387600  | -9.04301400 | 1.45604500  | -0.08662300 |
| H | -8.29138600 | -2.51531400 | 3.05057200  | -8.31580300 | 3.71740900  | -0.81554000 |
| H | -5.89008300 | -3.07787000 | 3.28062600  | -5.92517300 | 4.18280200  | -1.26531400 |
| H | -4.18852900 | -2.03196300 | 1.81235000  | -4.20723300 | 2.42041700  | -0.97415100 |
| H | 4.11386100  | 2.52855900  | 0.64679800  | 4.02584400  | 0.02004400  | 2.68725300  |
| H | 5.76967500  | 4.20755800  | 1.41594500  | 5.63572500  | 0.37421900  | 4.53777000  |
| H | 8.18865000  | 3.67838600  | 1.47051600  | 8.07001500  | 0.50636000  | 4.10034000  |
| H | 9.00739700  | 1.45181000  | 0.73508800  | 8.94985000  | 0.26133800  | 1.78965000  |
| H | 9.24994200  | -1.15429900 | -0.19698000 | 9.26501400  | -0.08016000 | -0.94036600 |
| H | 8.85018100  | -3.44545100 | -1.06852000 | 8.93284200  | -0.41453200 | -3.37991300 |
| H | 6.54741100  | -4.22372400 | -1.54475100 | 6.65124200  | -0.63483300 | -4.31787800 |
| H | 4.59744400  | -2.73538800 | -1.18216100 | 4.65619100  | -0.55112400 | -2.84894000 |

**Table S17.** Optimized geometries (in Å) and energies (in hartree) of *m*-CzOF in the ground and lowest triplet excited states.

|   | S <sub>0</sub> state |            |             | T <sub>1</sub> state  |            |             |
|---|----------------------|------------|-------------|-----------------------|------------|-------------|
|   | Energy = -1569.8704  |            |             | Energy = -1569.636603 |            |             |
| C | -3.39281700          | 2.42636200 | 0.20531400  | 3.41596600            | 2.36675300 | -0.22461300 |
| C | -3.05301700          | 1.05836300 | 0.17532000  | 3.03090200            | 0.97929300 | -0.15200200 |
| C | -1.71737100          | 0.65487700 | 0.08816800  | 1.71164200            | 0.58834900 | -0.08580900 |
| C | -0.72441500          | 1.63749800 | 0.04300600  | 0.69894200            | 1.60984300 | -0.08351200 |
| C | -1.09586500          | 2.99514700 | 0.06253300  | 1.12654700            | 3.00570300 | -0.14534400 |
| C | -2.41553600          | 3.41785100 | 0.13738400  | 2.42740000            | 3.39940800 | -0.21182900 |
| C | 1.09639000           | 2.99510000 | -0.06661600 | -1.08150700           | 3.01574500 | -0.03043700 |
| C | 0.72497500           | 1.63746800 | -0.04580000 | -0.68433800           | 1.62869500 | 0.00352500  |
| C | 1.71793100           | 0.65480400 | -0.08989900 | -1.71608300           | 0.63028800 | 0.07129100  |
| C | 3.05360200           | 1.05819600 | -0.17731200 | -3.03802100           | 1.05153700 | 0.12150800  |

Supplementary Material (ESI) for PCCP  
This journal is © the Owner Societies 2010

|   |             |             |             |             |             |             |
|---|-------------|-------------|-------------|-------------|-------------|-------------|
| C | 3.39335800  | 2.42618500  | -0.20866500 | -3.38416100 | 2.42443400  | 0.10196800  |
| C | 2.41606000  | 3.41772800  | -0.14178900 | -2.37272600 | 3.43813400  | 0.00872800  |
| O | 0.00024800  | 3.82388600  | -0.00245600 | 0.03428100  | 3.83783700  | -0.11678700 |
| C | 6.53014200  | 0.33217100  | 2.57793200  | -6.62062300 | 0.39386700  | -2.50494700 |
| C | 7.35780200  | -0.73728700 | 2.19467500  | -7.46902300 | -0.64227100 | -2.07859700 |
| C | 7.07366700  | -1.47813900 | 1.05106800  | -7.16716800 | -1.38109900 | -0.93743100 |
| C | 5.95452200  | -1.14192200 | 0.28045500  | -6.01082600 | -1.07385400 | -0.21229000 |
| C | 5.13737500  | -0.05213800 | 0.67598100  | -5.17349200 | -0.01484200 | -0.64815600 |
| C | 5.41031700  | 0.68843000  | 1.82919700  | -5.46207000 | 0.71932400  | -1.80256000 |
| C | 4.21802700  | -0.91212700 | -1.21377900 | -4.20975600 | -0.89117400 | 1.21070100  |
| C | 5.36834100  | -1.69015200 | -0.92511300 | -5.39658800 | -1.63155600 | 0.97493700  |
| C | 5.71568600  | -2.74693300 | -1.77484100 | -5.74878100 | -2.66719800 | 1.84767900  |
| C | 4.92565700  | -3.00856000 | -2.89048100 | -4.92731400 | -2.94560300 | 2.93653800  |
| C | 3.79565800  | -2.21978400 | -3.16737900 | -3.76134800 | -2.19399600 | 3.16239300  |
| C | 3.42689700  | -1.16247600 | -2.33819000 | -3.38632800 | -1.15950900 | 2.30768800  |
| N | 4.08519800  | 0.08157500  | -0.23697200 | -4.08418800 | 0.09277900  | 0.22203900  |
| C | -3.79911000 | -2.21112400 | 3.17354000  | 3.52370700  | -2.66742200 | -2.76138300 |
| C | -4.92942700 | -2.99993100 | 2.89801200  | 4.71865300  | -3.37073700 | -2.54015800 |
| C | -5.71834400 | -2.74106900 | 1.78093900  | 5.62908000  | -2.93556000 | -1.57943900 |
| C | -5.36962100 | -1.68697500 | 0.92843500  | 5.33228100  | -1.79380500 | -0.83011500 |
| C | -4.21905700 | -0.90884900 | 1.21585400  | 4.11328500  | -1.10533300 | -1.05193300 |
| C | -3.42893800 | -1.15650000 | 2.34156500  | 3.20377600  | -1.52788600 | -2.02503000 |
| C | -5.13603500 | -0.05389600 | -0.67730600 | 5.23603100  | 0.03648000  | 0.56455500  |
| C | -5.95428600 | -1.14196500 | -0.27933400 | 6.04664600  | -1.06818700 | 0.20216600  |
| C | -7.07302800 | -1.47955800 | -1.04993600 | 7.26806200  | -1.27070700 | 0.84951200  |
| C | -7.35568300 | -0.74171800 | -2.19585800 | 7.66111100  | -0.38169800 | 1.84876100  |
| C | -6.52700300 | 0.32613500  | -2.58140400 | 6.83575900  | 0.69367900  | 2.21413000  |
| C | -5.40755000 | 0.68371500  | -1.83274400 | 5.60953200  | 0.91306400  | 1.58796100  |
| N | -4.08456900 | 0.08172300  | 0.23613000  | 4.06453200  | 0.01651200  | -0.20634300 |
| H | -4.43876700 | 2.70218800  | 0.29063000  | 4.45987700  | 2.61458200  | -0.37010000 |
| H | -1.47255200 | -0.40176100 | 0.04940400  | 1.44591000  | -0.45810700 | 0.00518300  |
| H | -2.66979300 | 4.47208900  | 0.15713900  | 2.70554600  | 4.44584700  | -0.26166300 |
| H | 1.47306600  | -0.40177600 | -0.04997100 | -1.47388900 | -0.42623500 | 0.06187300  |
| H | 4.43928300  | 2.70198000  | -0.29434300 | -4.42622100 | 2.70833700  | 0.19055600  |
| H | 2.67032600  | 4.47194400  | -0.16258600 | -2.63221600 | 4.49023300  | -0.01957200 |
| H | 6.76410500  | 0.89341500  | 3.47857900  | -6.86758300 | 0.95144500  | -3.40437400 |
| H | 8.22432400  | -0.98843600 | 2.79969400  | -8.36459600 | -0.87147400 | -2.64909800 |
| H | 7.71029100  | -2.31006300 | 0.76114600  | -7.81880100 | -2.18953600 | -0.61609800 |
| H | 4.77055400  | 1.50971500  | 2.13562600  | -4.80343900 | 1.51101900  | -2.14384100 |
| H | 6.59363300  | -3.35315700 | -1.56706600 | -6.65484600 | -3.24352600 | 1.67918700  |
| H | 5.18460100  | -3.82698400 | -3.55611900 | -5.18928800 | -3.74833300 | 3.61993400  |
| H | 3.19571800  | -2.43497400 | -4.04750000 | -3.13625900 | -2.42168100 | 4.02164200  |

|   |             |             |             |             |             |             |
|---|-------------|-------------|-------------|-------------|-------------|-------------|
| H | 2.55791300  | -0.55240000 | -2.56243400 | -2.48695200 | -0.58062100 | 2.48859100  |
| H | -3.20002100 | -2.42418400 | 4.05475800  | 2.82992400  | -3.01585500 | -3.52130500 |
| H | -5.18947900 | -3.81622400 | 3.56583100  | 4.93591800  | -4.25857100 | -3.12688900 |
| H | -6.59647900 | -3.34736900 | 1.57417400  | 6.56029300  | -3.47227900 | -1.41905900 |
| H | -2.55964900 | -0.54642300 | 2.56464400  | 2.28249200  | -0.98646700 | -2.20665600 |
| H | -7.71050600 | -2.31018800 | -0.75818500 | 7.89933200  | -2.11424700 | 0.58336600  |
| H | -8.22186500 | -0.99397800 | -2.80090100 | 8.60856300  | -0.52867000 | 2.35911000  |
| H | -6.75988900 | 0.88505200  | -3.48377500 | 7.15019200  | 1.36442100  | 3.00876800  |
| H | -4.76702900 | 1.50380200  | -2.14081500 | 4.96436800  | 1.72902800  | 1.89410600  |

**Table S18.** Optimized geometries (in Å) and energies (in hartree) of *p*-CzOF in the ground and lowest triplet excited states.

|   | S <sub>0</sub> state |             |             | T <sub>1</sub> state  |             |             |
|---|----------------------|-------------|-------------|-----------------------|-------------|-------------|
|   | Energy = -1569.8696  |             |             | Energy = -1569.641188 |             |             |
| C | -3.40578900          | -0.05082600 | -0.46142500 | 3.41158600            | -0.47850400 | -0.07950700 |
| C | -3.06171400          | -0.05549800 | -1.82920600 | 3.04581700            | -1.85096100 | -0.07384700 |
| C | -1.73135300          | -0.02582200 | -2.23618500 | 1.72910300            | -2.25700900 | -0.05197000 |
| C | -0.72498600          | -0.01137300 | -1.26390600 | 0.69271900            | -1.25134100 | -0.02384400 |
| C | -1.09847200          | -0.01943200 | 0.09369700  | 1.10392900            | 0.13280400  | -0.03889500 |
| C | -2.41412200          | -0.02723200 | 0.52866400  | 2.39565100            | 0.55183100  | -0.06886700 |
| C | 1.09852900           | 0.01975900  | 0.09361900  | -1.10384100           | 0.13281900  | 0.03908900  |
| C | 0.72495800           | 0.01113000  | -1.26395700 | -0.69265500           | -1.25134700 | 0.02367000  |
| C | 1.73127600           | 0.02516500  | -2.23629400 | -1.72903800           | -2.25700500 | 0.05145400  |
| C | 3.06165800           | 0.05499800  | -1.82939900 | -3.04575000           | -1.85096500 | 0.07337000  |
| C | 3.40582300           | 0.05088200  | -0.46163400 | -3.41154200           | -0.47850500 | 0.07944500  |
| C | 2.41420100           | 0.02771900  | 0.52851100  | -2.39559200           | 0.55179800  | 0.06907200  |
| O | 0.00005500           | 0.00034200  | 0.92259000  | 0.00001600            | 0.95994300  | 0.00022800  |
| C | 6.77839000           | -2.70469800 | -1.58328000 | -6.84740600           | -1.87926200 | -2.46331800 |
| C | 8.01900300           | -2.35547900 | -1.02305900 | -8.07568200           | -1.27517100 | -2.14903600 |
| C | 8.13195600           | -1.24614500 | -0.19017600 | -8.15791800           | -0.32198300 | -1.13568000 |
| C | 6.99487400           | -0.47500000 | 0.07737000  | -7.00358400           | 0.01376900  | -0.42332700 |
| C | 5.75435000           | -0.83267400 | -0.50879400 | -5.77619200           | -0.62302600 | -0.73543000 |
| C | 5.63120800           | -1.95420500 | -1.33354100 | -5.68176800           | -1.55934400 | -1.76911300 |
| C | 5.37453300           | 1.00722100  | 0.77010000  | -5.34613000           | 0.85910400  | 0.93401900  |
| C | 6.75319200           | 0.69844200  | 0.89086200  | -6.72879900           | 0.96081700  | 0.63945100  |
| C | 7.57410100           | 1.50605700  | 1.68638200  | -7.52715000           | 1.84833200  | 1.36577100  |
| C | 7.01922200           | 2.60305700  | 2.33891700  | -6.94480100           | 2.61294800  | 2.37507100  |
| C | 5.65364500           | 2.90292400  | 2.19687000  | -5.57828400           | 2.48313700  | 2.67163400  |
| C | 4.81417400           | 2.11501400  | 1.41189500  | -4.76208500           | 1.60137100  | 1.96487300  |
| N | 4.77284800           | 0.07268900  | -0.08384800 | -4.76591500           | -0.10671000 | 0.09421600  |
| C | -6.77840100          | 2.70444300  | -1.58364900 | 6.84769600            | -1.88010700 | 2.46249300  |
| C | -8.01905600          | 2.35518100  | -1.02354600 | 8.07594600            | -1.27596000 | 2.14823500  |

|   |             |             |             |             |             |             |
|---|-------------|-------------|-------------|-------------|-------------|-------------|
| C | -8.13202900 | 1.24594000  | -0.19054300 | 8.15809300  | -0.32241100 | 1.13521000  |
| C | -6.99492200 | 0.47491500  | 0.07725200  | 7.00369200  | 0.01363700  | 0.42310900  |
| C | -5.75434300 | 0.83266000  | -0.50876400 | 5.77632200  | -0.62325900 | 0.73515300  |
| C | -5.63118500 | 1.95409200  | -1.33364700 | 5.68197500  | -1.55989400 | 1.76855900  |
| C | -5.37450900 | -1.00703900 | 0.77039600  | 5.34602400  | 0.85953800  | -0.93362500 |
| C | -6.75322600 | -0.69839800 | 0.89092400  | 6.72875200  | 0.96110900  | -0.63925800 |
| C | -7.57415100 | -1.50604800 | 1.68639400  | 7.52694800  | 1.84892600  | -1.36537400 |
| C | -7.01923500 | -2.60291700 | 2.33911800  | 6.94438100  | 2.61397000  | -2.37423000 |
| C | -5.65359700 | -2.90262200 | 2.19732700  | 5.57781100  | 2.48429400  | -2.67058800 |
| C | -4.81410200 | -2.11468100 | 1.41240800  | 4.76175700  | 1.60221100  | -1.96404700 |
| N | -4.77279800 | -0.07250300 | -0.08352300 | 4.76595800  | -0.10665100 | -0.09417900 |
| H | -3.85658100 | -0.09668700 | -2.56626100 | 3.83649900  | -2.59262400 | -0.12746800 |
| H | -1.48488900 | -0.02979000 | -3.29395400 | 1.47300800  | -3.31078800 | -0.07447400 |
| H | -2.66685100 | -0.00224600 | 1.58229500  | 2.66070500  | 1.60110700  | -0.03425700 |
| H | 1.48476300  | 0.02871200  | -3.29405300 | -1.47295400 | -3.31079300 | 0.07368900  |
| H | 3.85647200  | 0.09591400  | -2.56652600 | -3.83642000 | -2.59266200 | 0.12670700  |
| H | 2.66696800  | 0.00316900  | 1.58214400  | -2.66060400 | 1.60109500  | 0.03481500  |
| H | 6.70758300  | -3.58032200 | -2.22286900 | -6.79919500 | -2.60687300 | -3.26872000 |
| H | 8.89484900  | -2.96067800 | -1.23887400 | -8.96636400 | -1.54647600 | -2.70841500 |
| H | 9.08972300  | -0.98343500 | 0.25146400  | -9.10487800 | 0.16005000  | -0.90762500 |
| H | 4.67522200  | -2.23745700 | -1.76116100 | -4.73383100 | -2.01421600 | -2.03334000 |
| H | 8.63246000  | 1.28068800  | 1.78870800  | -8.58922300 | 1.93452000  | 1.15199800  |
| H | 7.64591400  | 3.23627700  | 2.96037900  | -7.55446300 | 3.30770000  | 2.94554500  |
| H | 5.24013200  | 3.76872700  | 2.70693000  | -5.14576400 | 3.07474100  | 3.47367400  |
| H | 3.76336100  | 2.36054100  | 1.30009200  | -3.71346600 | 1.49024800  | 2.21643400  |
| H | -6.70759800 | 3.57999200  | -2.22334200 | 6.79957700  | -2.60797800 | 3.26766500  |
| H | -8.89492800 | 2.96027400  | -1.23955200 | 8.96670800  | -1.54752700 | 2.70736200  |
| H | -9.08984100 | 0.98320700  | 0.25098700  | 9.10503900  | 0.15970300  | 0.90726800  |
| H | -4.67516100 | 2.23734700  | -1.76117800 | 4.73402900  | -2.01476100 | 2.03275900  |
| H | -8.63255500 | -1.28080600 | 1.78854700  | 8.58907300  | 1.93500700  | -1.15181800 |
| H | -7.64594900 | -3.23615700 | 2.96053600  | 7.55391800  | 3.30901300  | -2.94448600 |
| H | -5.24006000 | -3.76831900 | 2.70754700  | 5.14514700  | 3.07623400  | -3.47230100 |
| H | -3.76323100 | -2.36005200 | 1.30081600  | 3.71309800  | 1.49110600  | -2.21545800 |

**Table S19.** Optimized geometries (in Å) and energies (in hartree) of *m*-CzSF in the ground and lowest triplet excited states.

|   | S <sub>0</sub> state |            |            | T <sub>1</sub> state  |            |            |
|---|----------------------|------------|------------|-----------------------|------------|------------|
|   | Energy = -1892.8483  |            |            | Energy = -1892.615952 |            |            |
| C | 3.48260400           | 2.36634300 | 0.27115900 | 3.47062400            | 2.42096600 | 0.23378800 |
| C | 2.97386100           | 1.05377500 | 0.22304500 | 2.98738800            | 1.11112600 | 0.22147700 |
| C | 1.60105800           | 0.83627200 | 0.10989000 | 1.61565600            | 0.84433700 | 0.11172200 |
| C | 0.72531300           | 1.92888200 | 0.05623700 | 0.68571400            | 1.92422700 | 0.02628500 |

Supplementary Material (ESI) for PCCP  
This journal is © the Owner Societies 2010

|   |             |             |             |             |             |             |
|---|-------------|-------------|-------------|-------------|-------------|-------------|
| C | 1.25453700  | 3.23846100  | 0.09462800  | 1.21738200  | 3.25534500  | 0.02990100  |
| C | 2.62947300  | 3.46144700  | 0.19649900  | 2.55826000  | 3.51484500  | 0.12286800  |
| C | -1.25465100 | 3.23835300  | -0.09525100 | -1.32145600 | 3.23692400  | -0.16762800 |
| C | -0.72534000 | 1.92882100  | -0.05656100 | -0.71179000 | 1.88635200  | -0.08891600 |
| C | -1.60099400 | 0.83612500  | -0.10995000 | -1.59485000 | 0.76610600  | -0.11591600 |
| C | -2.97382100 | 1.05347400  | -0.22315000 | -2.95498200 | 0.96437600  | -0.19924700 |
| C | -3.48265100 | 2.36600300  | -0.27156800 | -3.53445800 | 2.30218000  | -0.27439900 |
| C | -2.62960900 | 3.46119100  | -0.19717000 | -2.68448900 | 3.42035100  | -0.26718300 |
| S | -0.00010000 | 4.47797200  | -0.00047400 | -0.08986400 | 4.47920400  | -0.10542200 |
| C | -6.43628200 | -0.05867900 | 2.41901600  | -6.83005700 | 0.25812200  | 1.95652600  |
| C | -7.10273600 | -1.23446400 | 2.03328600  | -7.47316700 | -0.93700300 | 1.60038000  |
| C | -6.67923600 | -1.95613000 | 0.92095700  | -6.89593100 | -1.80530800 | 0.67402000  |
| C | -5.58276100 | -1.49326100 | 0.18397200  | -5.67714500 | -1.45788200 | 0.08853100  |
| C | -4.93019900 | -0.29817900 | 0.58067500  | -5.05551100 | -0.23332700 | 0.43316200  |
| C | -5.34254800 | 0.42437300  | 1.70352200  | -5.60786400 | 0.62172900  | 1.39147600  |
| C | -3.82846700 | -1.07483200 | -1.24721100 | -3.67452600 | -1.28934900 | -1.04248200 |
| C | -4.88109500 | -1.98766000 | -0.98253600 | -4.79992900 | -2.12810600 | -0.85327800 |
| C | -5.05537500 | -3.09840800 | -1.81657400 | -4.89156300 | -3.33492200 | -1.54969000 |
| C | -4.19291100 | -3.28012400 | -2.89371900 | -3.86992300 | -3.68643700 | -2.43077000 |
| C | -3.16273200 | -2.35843500 | -3.14822400 | -2.77344100 | -2.83341300 | -2.62831700 |
| C | -2.96656400 | -1.24502400 | -2.33388400 | -2.66057200 | -1.62382500 | -1.94372400 |
| N | -3.86523000 | -0.05004600 | -0.29349500 | -3.83728800 | -0.12522700 | -0.26385500 |
| C | 3.16394700  | -2.35664100 | 3.14975000  | 3.22743100  | -2.24851000 | 3.19966500  |
| C | 4.19397900  | -3.27850200 | 2.89525200  | 4.25800700  | -3.17150600 | 2.94979400  |
| C | 5.05598300  | -3.09736700 | 1.81764400  | 5.11134800  | -3.00266600 | 1.86313000  |
| C | 4.88139300  | -1.98703400 | 0.98311400  | 4.92752400  | -1.90428300 | 1.01497100  |
| C | 3.82894500  | -1.07400600 | 1.24783200  | 3.87452500  | -0.98940400 | 1.27515400  |
| C | 2.96749400  | -1.24361800 | 2.33495300  | 3.02219900  | -1.14677000 | 2.37216800  |
| C | 4.92989000  | -0.29830000 | -0.58092000 | 4.95723700  | -0.23520200 | -0.56965500 |
| C | 5.58255600  | -1.49324100 | -0.18394800 | 5.61713500  | -1.42398800 | -0.16405900 |
| C | 6.67861700  | -1.95655400 | -0.92127400 | 6.70806800  | -1.89400500 | -0.90503400 |
| C | 7.10161600  | -1.23545200 | -2.03415600 | 7.11919200  | -1.18646800 | -2.03085400 |
| C | 6.43508300  | -0.05978000 | -2.42010900 | 6.44645100  | -0.01653000 | -2.42472800 |
| C | 5.34175100  | 0.42370400  | -1.70429800 | 5.35952400  | 0.47431800  | -1.70478600 |
| N | 3.86536700  | -0.04966900 | 0.29363800  | 3.89964600  | 0.02112700  | 0.30934200  |
| H | 4.55239900  | 2.51397600  | 0.37740000  | 4.53265900  | 2.60599300  | 0.34669300  |
| H | 1.22425600  | -0.18039700 | 0.05615100  | 1.27300300  | -0.18409500 | 0.07085100  |
| H | 3.02994600  | 4.47010400  | 0.23248200  | 2.93759300  | 4.53234300  | 0.12780400  |
| H | -1.22408800 | -0.18049100 | -0.05593400 | -1.19919100 | -0.23774000 | -0.01051600 |
| H | -4.55245000 | 2.51354900  | -0.37787700 | -4.59413300 | 2.40981100  | -0.46532200 |
| H | -3.03017600 | 4.46980200  | -0.23340400 | -3.10593600 | 4.41803700  | -0.34921000 |
| H | -6.77660400 | 0.48597900  | 3.29558300  | -7.28305600 | 0.91017900  | 2.69782200  |

|   |             |             |             |             |             |             |
|---|-------------|-------------|-------------|-------------|-------------|-------------|
| H | -7.95306100 | -1.58365800 | 2.61206100  | -8.42101000 | -1.19545900 | 2.06340500  |
| H | -7.18983200 | -2.87035200 | 0.62950500  | -7.38178900 | -2.74323400 | 0.41944600  |
| H | -4.82686000 | 1.32728500  | 2.01399200  | -5.10116900 | 1.53002000  | 1.69626000  |
| H | -5.85710200 | -3.80722300 | -1.62615300 | -5.75078600 | -3.98569900 | -1.41229100 |
| H | -4.31736700 | -4.13929900 | -3.54659700 | -3.92628500 | -4.62411100 | -2.97585000 |
| H | -2.50446800 | -2.51331100 | -3.99878400 | -1.99379600 | -3.11597600 | -3.32980500 |
| H | -2.17439900 | -0.53339300 | -2.54246700 | -1.81824200 | -0.96479000 | -2.11631700 |
| H | 2.50604000  | -2.51107700 | 4.00066500  | 2.57712200  | -2.39279100 | 4.05834900  |
| H | 4.31868600  | -4.13735700 | 3.54850400  | 4.39063500  | -4.02074200 | 3.61418100  |
| H | 5.85757300  | -3.80633800 | 1.62722100  | 5.91367000  | -3.71199100 | 1.67648000  |
| H | 2.17544500  | -0.53184400 | 2.54349800  | 2.23074600  | -0.43289800 | 2.57506300  |
| H | 7.18930000  | -2.87067000 | -0.62964100 | 7.22400100  | -2.80284000 | -0.60578000 |
| H | 7.95161200  | -1.58500500 | -2.61319800 | 7.96533600  | -1.54088400 | -2.61278700 |
| H | 6.77502800  | 0.48443400  | -3.29709700 | 6.77846800  | 0.51847200  | -3.31052900 |
| H | 4.82599100  | 1.32653100  | -2.01490100 | 4.84141100  | 1.37543200  | -2.01571300 |

**Table S20.** Optimized geometries (in Å) and energies (in hartree) of *p*-CzSF in the ground and lowest triplet excited states.

|   | S <sub>0</sub> state |             |             | T <sub>1</sub> state  |             |             |
|---|----------------------|-------------|-------------|-----------------------|-------------|-------------|
|   | Energy = -1892.848   |             |             | Energy = -1892.618943 |             |             |
| C | -3.50056100          | 0.02368100  | -0.34441400 | 3.50418400            | -0.23940000 | 0.27271800  |
| C | -2.98671800          | 0.02666300  | -1.65609400 | 2.96872300            | -1.19668000 | 1.17558900  |
| C | -1.61647800          | 0.00762900  | -1.87772000 | 1.61338900            | -1.34985400 | 1.33577100  |
| C | -0.72623000          | 0.00401500  | -0.79311100 | 0.69286700            | -0.53408400 | 0.56938600  |
| C | -1.25946800          | 0.01121900  | 0.51594900  | 1.26991500            | 0.43428800  | -0.34741400 |
| C | -2.63342000          | 0.00985500  | 0.75185000  | 2.61611200            | 0.59451800  | -0.49742700 |
| C | 1.25948200           | -0.01066700 | 0.51595700  | -1.26985900           | 0.43428500  | -0.34750300 |
| C | 0.72623900           | -0.00506700 | -0.79311000 | -0.69286100           | -0.53409200 | 0.56934800  |
| C | 1.61647700           | -0.01001200 | -1.87772300 | -1.61341200           | -1.34982500 | 1.33569000  |
| C | 2.98672100           | -0.02874100 | -1.65608200 | -2.96873200           | -1.19666200 | 1.17544700  |
| C | 3.50056200           | -0.02410500 | -0.34440900 | -3.50415900           | -0.23941400 | 0.27248400  |
| C | 2.63343600           | -0.00898800 | 0.75184500  | -2.61607600           | 0.59445100  | -0.49759500 |
| S | 0.00000900           | 0.00101500  | 1.75634600  | 0.00002500            | 1.32087400  | -1.22160300 |
| C | 6.06650500           | -2.86544300 | 2.01950700  | -6.08056600           | 3.44065500  | 0.29688800  |
| C | 7.43709600           | -2.55557800 | 2.00068800  | -7.44395500           | 3.18749900  | 0.07496300  |
| C | 7.90370200           | -1.45394000 | 1.28950600  | -7.90277000           | 1.88421300  | -0.10864000 |
| C | 6.98924700           | -0.65108700 | 0.59775000  | -6.98423500           | 0.83149500  | -0.08699500 |
| C | 5.60824500           | -0.96998600 | 0.63964100  | -5.60798700           | 1.10556300  | 0.11232900  |
| C | 5.13503400           | -2.08275600 | 1.34020800  | -5.14553000           | 2.40722700  | 0.32774900  |
| C | 5.82073100           | 0.87537200  | -0.66957500 | -5.81057500           | -1.15059600 | -0.08044600 |
| C | 7.12447200           | 0.52590600  | -0.23530300 | -7.11392200           | -0.60763100 | -0.20612700 |
| C | 8.21588700           | 1.30718000  | -0.63234100 | -8.19951200           | -1.45924300 | -0.42702000 |



Supplementary Material (ESI) for PCCP  
This journal is © the Owner Societies 2010

|   |             |             |             |             |             |             |
|---|-------------|-------------|-------------|-------------|-------------|-------------|
| C | 7.99643700  | 2.41787100  | -1.44193200 | -7.97480100 | -2.83097600 | -0.52814400 |
| C | 6.69566200  | 2.75849100  | -1.85053900 | -6.67436900 | -3.35146100 | -0.42663000 |
| C | 5.59190600  | 1.99779900  | -1.47007800 | -5.57511300 | -2.52243400 | -0.20901700 |
| N | 4.90307000  | -0.03835000 | -0.13444300 | -4.89297200 | -0.10400100 | 0.11447600  |
| C | -6.06631300 | 2.86690400  | 2.01754800  | 6.08060400  | 3.44062800  | 0.29710500  |
| C | -7.43691500 | 2.55707600  | 1.99900300  | 7.44395400  | 3.18748700  | 0.07494700  |
| C | -7.90358400 | 1.45496200  | 1.28860100  | 7.90275600  | 1.88421100  | -0.10877900 |
| C | -6.98918400 | 0.65159500  | 0.59737300  | 6.98424200  | 0.83148100  | -0.08701900 |
| C | -5.60816400 | 0.97045100  | 0.63899900  | 5.60801900  | 1.10554000  | 0.11251500  |
| C | -5.13489700 | 2.08370500  | 1.33876300  | 5.14558200  | 2.40718900  | 0.32807500  |
| C | -5.82080700 | -0.87577900 | -0.66897500 | 5.81056700  | -1.15060700 | -0.08043300 |
| C | -7.12450700 | -0.52595100 | -0.23488100 | 7.11390400  | -0.60764000 | -0.20625300 |
| C | -8.21598500 | -1.30741600 | -0.63136700 | 8.19945900  | -1.45926400 | -0.42725800 |
| C | -7.99663800 | -2.41864900 | -1.44024200 | 7.97472000  | -2.83099500 | -0.52837700 |
| C | -6.69590400 | -2.75961000 | -1.84869000 | 6.67429900  | -3.35147400 | -0.42672900 |
| C | -5.59208900 | -1.99873500 | -1.46876600 | 5.57507300  | -2.52243800 | -0.20898400 |
| N | -4.90305900 | 0.03823400  | -0.13447500 | 4.89299700  | -0.10401600 | 0.11468800  |
| H | -3.67730700 | 0.05817200  | -2.49218300 | 3.65517000  | -1.78570600 | 1.77566400  |
| H | -1.23624200 | 0.01146900  | -2.89551900 | 1.22524600  | -2.06609400 | 2.05267100  |
| H | -3.03442900 | -0.01399400 | 1.75968600  | 3.03018000  | 1.29327900  | -1.21601600 |
| H | 1.23623100  | -0.01512700 | -2.89551300 | -1.22531100 | -2.06603700 | 2.05264300  |
| H | 3.67730500  | -0.06133100 | -2.49213700 | -3.65520400 | -1.78565900 | 1.77551900  |
| H | 3.03446800  | 0.01605100  | 1.75964600  | -3.03008200 | 1.29321600  | -1.21622200 |
| H | 5.72204100  | -3.73504500 | 2.57257800  | -5.74453800 | 4.46137900  | 0.45668700  |
| H | 8.13703900  | -3.18490800 | 2.54284200  | -8.14775200 | 4.01464600  | 0.05791600  |
| H | 8.96519600  | -1.22131700 | 1.26697900  | -8.96119000 | 1.68821200  | -0.25842700 |
| H | 4.08011900  | -2.33599600 | 1.35188200  | -4.09874400 | 2.60943800  | 0.52483900  |
| H | 9.22110100  | 1.05149200  | -0.30749200 | -9.20384700 | -1.05617600 | -0.52680800 |
| H | 8.83576300  | 3.03102700  | -1.75739500 | -8.81066300 | -3.50368100 | -0.69731800 |
| H | 6.54315800  | 3.63546300  | -2.47381000 | -6.51685900 | -4.42181300 | -0.52624800 |
| H | 4.58978300  | 2.27437000  | -1.78049400 | -4.57210600 | -2.93024100 | -0.15458200 |
| H | -5.72179300 | 3.73688400  | 2.56998800  | 5.74460200  | 4.46134500  | 0.45700800  |
| H | -8.13681500 | 3.18681200  | 2.54074200  | 8.14774500  | 4.01463800  | 0.05781300  |
| H | -8.96508800 | 1.22236900  | 1.26626100  | 8.96115900  | 1.68823700  | -0.25872200 |
| H | -4.07998000 | 2.33694100  | 1.35021500  | 4.09882700  | 2.60936400  | 0.52536500  |
| H | -9.22117100 | -1.05145500 | -0.30664500 | 9.20378900  | -1.05621500 | -0.52716000 |
| H | -8.83601700 | -3.03195600 | -1.75527100 | 8.81056200  | -3.50370300 | -0.69763700 |
| H | -6.54347800 | -3.63698700 | -2.47140700 | 6.51677500  | -4.42182500 | -0.52633500 |
| H | -4.58999700 | -2.27552700 | -1.77907600 | 4.57206500  | -2.93022600 | -0.15443400 |

---
